# Supplementary material for: Identifying Risk Factors for Secondary Infection Post-SARS-CoV-2 Infection in Patients With Severe and Critical COVID-19
Source: Front Immunol. 2021 Sep 30;12:715023. doi: 10.3389/fimmu.2021.715023 (PMC8514874; doi:10.3389/fimmu.2021.715023)
Supplement: Supplementary file 6 [file Table_5.xls]

## Sheet: Table S5
Table S5. Metagenomic analysis of BALF in COVID-19 with the secondary risk of bacteria or fungi infection.
ID	Risk Case #4	Risk Case #7	Risk Case #8	Non_Risk Case #1	Non_Risk Case #2
Klebsiella pneumoniae	1113	2	43	3	0
Klebsiella pneumoniae subsp. pneumoniae	868	5	8	0	0
Acinetobacter baumannii	382	2	5548	1	2
Stenotrophomonas maltophilia	295	2	2381	0	2
Ralstonia pickettii	0	263	0	0	0
Pseudomonas aeruginosa	66515	1	42	47	1
Mycoplasma salivarium	5652	12	0	1	0
Pseudomonas stutzeri	1813	5	3	0	0
Pseudomonas fluorescens Q2-87	1525	0	34	2	0
Escherichia coli	1487	3	75	13	0
Pseudomonas sp. S150	1414	0	2	0	0
Pseudomonas putida	1330	1	8	1	1
Pseudomonas aeruginosa LESlike1	1299	0	0	0	0
Pseudomonas sp. StFLB209	1058	1	0	1	0
Enterococcus faecalis	952	0	10	1	0
Candidatus Pseudomonas adelgestsugas	718	0	2	1	0
Salmonella enterica subsp. enterica	639	0	14	3	0
Piscirickettsia salmonis	562	0	1	0	1
Sodalis endosymbiont of Henestaris halophilus	508	0	0	1	0
Pseudomonas stutzeri DSM 10701	484	1	1	0	0
Pseudomonas taetrolens	477	0	0	0	0
Vibrio taketomensis	465	0	7	0	0
Photorhabdus laumondii subsp. laumondii	461	0	2	0	0
Salmonella enterica subsp. enterica serovar Anatum str. USDA-ARS-USMARC-1727	455	0	15	1	0
Vibrio tapetis subsp. tapetis	448	0	16	1	0
Grimontia hollisae	437	0	1	0	0
Pantoea ananatis	429	0	1	0	0
Oblitimonas alkaliphila	401	0	0	0	0
Pseudomonas fluorescens	374	1	0	0	0
Pseudomonas azotoformans	356	0	0	0	0
Kangiella sediminilitoris	353	0	0	0	0
Pseudomonas guangdongensis	343	0	0	0	0
Salmonella enterica	339	2	7	3	1
Pseudomonas sp. TCU-HL1	334	0	0	0	0
Pseudomonas synxantha	330	0	0	0	0
Vibrio parahaemolyticus	324	1	3	0	0
Salmonella enterica subsp. enterica serovar Bareilly str. CFSAN000752	322	0	1	1	0
Thermochromatium tepidum ATCC 43061	318	0	122	0	0
Saliniradius amylolyticus	304	0	0	0	0
Pseudomonas koreensis	301	0	0	1	0
Xanthomonas hortorum pv. carotae str. M081	289	2	0	0	0
Pseudomonas furukawaii	289	1	0	0	0
Yersinia pestis	284	0	6	0	0
Pseudomonas oryzihabitans	277	1	0	1	0
Pseudomonas aeruginosa B136-33	276	0	0	0	0
Klebsiella aerogenes	270	0	3	0	0
Pseudomonas oryzae	266	0	0	0	0
Candidatus Sodalis pierantonius str. SOPE	263	1	17	0	0
Pseudoalteromonas translucida KMM 520	262	0	0	0	0
Pseudomonas entomophila	255	0	0	1	0
Pseudomonas stutzeri CCUG 29243	254	0	10	0	0
Halomonas sp. JS92-SW72	253	2	27	4	2
Bacillus anthracis	253	0	0	0	0
Pseudomonas lactis	252	0	8	0	0
Pseudomonas sp. SWI6	251	0	3	0	0
Methylomicrobium buryatense	250	0	0	0	0
Sulfurivermis fontis	247	0	1	0	0
Pseudomonas sp. K2W31S-8	243	0	0	0	0
Oceanospirillales bacterium S2-4-1H	241	0	0	0	0
Pseudomonas litoralis	239	0	29	0	0
Marichromatium purpuratum 984	232	0	0	0	0
Pseudomonas psychrophila	231	0	0	0	0
Sphingomonas sp. C8-2	227	117	319	184	29
Dokdonella koreensis DS-123	226	2	2	0	0
Vibrio cholerae	226	1	13	1	0
Pseudomonas putida ND6	214	0	0	0	1
Pseudomonas sp. KUIN-1	213	0	0	0	0
Pseudomonas putida group	210	0	0	1	0
endosymbiont of unidentified scaly snail isolate Monju	206	0	2	0	0
Erythrobacter sp. HKB08	200	2	2	9	0
Pseudomonas citronellolis	195	0	0	0	0
Escherichia coli O103:H2	186	0	0	0	0
Pseudomonas sp. BJP69	185	4	0	0	0
Mycoplasma arthritidis	183	1	0	0	0
Pseudomonas chlororaphis subsp. aurantiaca	179	0	0	1	0
Pseudomonas cremoricolorata	179	0	0	0	0
Vibrio campbellii	178	0	4	1	0
Photobacterium damselae subsp. piscicida	177	0	0	0	0
endosymbiont of Pachyrhynchus infernalis	175	2	0	0	0
Bacillus megaterium	170	89	70	113	151
Pseudomonas aeruginosa LESB65	170	0	0	0	0
Acinetobacter pittii PHEA-2	168	0	145	0	0
Pseudomonas sp. C27(2019)	160	3	3	0	0
Alteromonas australica	158	0	0	0	0
Salmonella enterica subsp. enterica serovar Anatum str. USDA-ARS-USMARC-1765	158	0	0	0	0
Pseudomonas coronafaciens pv. oryzae str. 1_6	149	0	0	0	0
Pseudomonas lurida	148	0	0	0	0
Agarilytica rhodophyticola	142	0	0	0	0
Xenorhabdus doucetiae	141	0	2	0	0
Succinivibrio dextrinosolvens	140	0	0	0	0
Pseudomonas aeruginosa RP73	137	0	0	0	0
Pasteurella multocida subsp. multocida	134	10	8	8	7
Salmonella enterica subsp. enterica serovar Montevideo str. USDA-ARS-USMARC-1901	132	0	0	0	1
Pseudomonas aeruginosa group	132	0	0	0	0
Beggiatoa leptomitoformis	130	1	0	2	0
Blautia coccoides	127	0	11	0	0
Pseudomonas xinjiangensis	125	0	0	0	0
Laribacter hongkongensis HLHK9	124	7	2	0	0
Mycoplasmopsis columbina	122	0	0	1	0
Simiduia agarivorans SA1 = DSM 21679	120	0	4	0	0
Enterobacter sp. LU1	119	3	3	1	0
Candidatus Hodgkinia cicadicola	119	2	4	1	0
Pseudomonas lundensis	119	0	6	0	0
Parashewanella spongiae	119	0	0	0	0
Pseudomonas fulva 12-X	118	0	0	1	0
Shewanella japonica	115	0	2	0	0
Mycoplasma orale	114	0	17	0	0
Neisseria lactamica 020-06	112	3	9	9	0
Rahnella aquatilis HX2	112	0	0	0	0
Chromatiaceae bacterium 2141T.STBD.0c.01a	110	0	0	0	0
Staphylococcus aureus	109	11	25	6	7
Pseudomonas synxantha BG33R	107	0	18	0	0
Pasteurella multocida	105	0	3	0	0
Ahniella affigens	104	1	9	0	0
Aquicella lusitana	104	0	0	0	0
Pseudomonas sp. MYb193	103	0	0	0	0
Thioploca ingrica	103	0	0	0	0
Bacillus thuringiensis	102	0	11	0	0
Saccharophagus degradans 2-40	101	0	0	0	0
Solimonas sp. K1W22B-7	99	0	1	0	2
Mycolicibacterium mageritense	98	5	51	25	0
Pseudomonas aeruginosa LES431	98	0	0	0	0
Pseudomonas asturiensis	97	0	8	0	0
Halomonas sp. THAF5a	96	0	0	0	0
Ralstonia solanacearum CMR15	95	4	6	1	1
Pseudomonas savastanoi pv. savastanoi NCPPB 3335	94	0	0	0	0
Acinetobacter schindleri	92	0	45	0	1
Streptococcus pyogenes	91	0	4	4	0
Neptunomonas concharum	91	0	1	0	0
Coxiella endosymbiont of Amblyomma sculptum	90	0	7	0	0
Pseudomonas aeruginosa PAK	90	0	0	0	0
Pseudomonas chlororaphis	90	0	0	0	0
Vibrio cholerae MJ-1236	90	0	0	0	0
Bacillus licheniformis	89	0	6	0	0
Aliivibrio salmonicida LFI1238	89	0	0	0	0
Pseudomonas sp. JY-Q	89	0	0	0	0
Shigella flexneri	88	0	2	1	0
Pantoea sp. At-9b	85	2	4	0	0
Plautia stali symbiont	85	0	0	0	0
Pseudomonas sp. DY-1	84	0	0	0	0
[Enterobacter] lignolyticus SCF1	83	0	2	0	0
Desulfovibrio gigas DSM 1382 = ATCC 19364	83	0	0	0	0
Candidatus Hamiltonella defensa	81	0	0	0	1
Halioglobus japonicus	81	0	0	0	0
Candidatus Baumannia cicadellinicola	79	0	4	0	0
Sulfurifustis variabilis	78	0	0	0	0
Cellvibrio sp. PSBB023	77	0	0	1	0
Pseudomonas sp. OIL-1	77	0	0	1	0
Shigella boydii	76	0	0	1	0
Pantoea agglomerans	75	1	1	0	0
Pseudomonas sp. ATCC 13867	75	0	0	0	0
Fictibacillus phosphorivorans	74	0	0	0	0
Yersinia pseudotuberculosis complex	74	0	0	0	0
Pseudomonas putida B6-2	73	0	0	0	0
Dichelobacter nodosus	72	0	4	0	0
Pseudomonas sp. CMR5c	72	0	0	0	0
Bacillus cereus D17	71	0	1	1	1
Azotobacter salinestris	71	0	0	1	0
Pseudomonas oleovorans	69	0	1	0	0
Bacillus coagulans 36D1	68	0	3	0	0
Burkholderia cepacia GG4	67	1	1	0	0
Enterobacter hormaechei	67	0	4	1	0
Shewanella baltica	67	0	6	0	0
Shewanella pealeana ATCC 700345	67	0	2	0	0
Weissella hellenica	66	1	0	0	0
Escherichia coli UMNF18	66	0	0	0	0
Methylovulum psychrotolerans	66	0	0	0	0
Pseudomonas chlororaphis subsp. aureofaciens 30-84	66	0	0	0	0
Candidatus Rickettsiella viridis	64	2	3	0	0
Pseudomonas putida SJTE-1	64	0	0	0	0
Xylella taiwanensis	63	0	0	0	0
Gemmatimonas aurantiaca T-27	62	1	0	0	1
Lactobacillus buchneri subsp. silagei CD034	62	0	0	0	0
Pseudomonas fuscovaginae	62	0	0	0	0
Meiothermus ruber DSM 1279	60	8	12	2	3
Pseudomonas plecoglossicida	60	0	0	0	0
Pseudoalteromonas sp. DL-6	59	0	1	0	0
Pseudomonas denitrificans (nom. rej.)	59	0	0	0	0
Pseudomonas salegens	59	0	0	0	0
Salmonella enterica subsp. enterica serovar Heidelberg str. B182	59	0	0	0	0
Bacillus velezensis NJN-6	58	0	3	1	0
Devosia sp. A16	58	0	6	0	2
Aggregatibacter actinomycetemcomitans NUM4039	58	0	2	0	0
Azotobacter vinelandii	58	0	0	0	0
Pseudomonas sp. PONIH3	58	0	0	0	0
Pseudomonas monteilii	57	0	1	0	0
Torque teno virus	55	0	0	0	0
Clostridium botulinum CDC_1436	54	0	0	1	0
Candidatus Portiera aleyrodidarum	54	0	2	0	0
Helicobacter pylori SS1	54	0	2	0	0
Pseudomonas balearica DSM 6083	54	0	0	0	0
Burkholderiales bacterium YL45	53	5	1	0	0
Persephonella marina EX-H1	53	0	1	0	0
Reinekea forsetii	51	0	1	0	0
Staphylococcus condimenti	51	0	0	0	0
Escherichia coli O104:H4 str. 2011C-3493	49	0	0	0	0
Pectobacterium parmentieri	48	0	3	0	0
Leclercia sp. LSNIH3	48	0	0	0	0
Proteus mirabilis	47	2	6	0	1
Cronobacter sakazakii SP291	47	0	0	0	0
Pseudomonas sp. S-6-2	47	0	0	0	0
Torque teno virus 29	47	0	0	0	0
Winogradskyella sp. PG-2	46	1	2	0	1
Klebsiella quasipneumoniae subsp. similipneumoniae	46	0	0	1	0
Mycobacterium tuberculosis TRS11	46	0	0	0	0
Yersinia pestis Pestoides G	45	0	1	0	0
Bdellovibrio exovorus JSS	44	0	3	0	0
Raoultella electrica	43	0	1	0	0
Azotobacter chroococcum	43	0	0	0	0
Pseudomonas pohangensis	42	0	0	1	0
Candidatus Blochmannia vafer str. BVAF	42	0	0	0	0
Mycolicibacterium arabiense	42	0	0	0	0
Shewanella maritima	42	0	0	0	0
Bacillus cereus	41	12	9	2	1
Gallaecimonas mangrovi	41	0	3	0	0
Pseudomonas umsongensis	41	0	0	0	0
Vibrio harveyi group	41	0	0	0	0
Pseudomonas brassicacearum	40	0	0	0	0
Silvanigrellales bacterium RF1110005	40	0	0	0	0
Thiomicrorhabdus indica	40	0	0	0	0
Legionella pneumophila	39	2	1	3	0
Candidatus Arsenophonus lipoptenae	39	0	0	1	0
Pseudomonas veronii	39	0	1	0	0
Pseudomonas parafulva	39	0	0	0	0
Hydrogenophaga sp. NH-16	38	11	5	4	6
Moraxella catarrhalis	38	0	7	0	0
Pseudomonas chlororaphis O6	38	0	0	0	0
Pseudomonas sabulinigri	38	0	0	0	0
Shigella dysenteriae	38	0	0	0	0
Catenovulum sediminis	37	0	0	0	0
Kosakonia cowanii	37	0	0	0	0
Cutibacterium acnes	36	68	312	257	1485
Gammaproteobacteria bacterium DM2	36	1	0	0	0
Buchnera aphidicola	36	0	8	0	0
Glaciecola sp. 4H-3-7+YE-5	36	0	0	0	0
Vibrio atlanticus LGP32	36	0	0	0	0
Rahnella aquatilis	35	0	3	0	1
Bacillus velezensis	35	0	0	0	0
Limosilactobacillus fermentum	34	7	3	3	14
Staphylococcus argenteus	34	0	1	0	0
Klebsiella michiganensis	34	0	0	0	0
Candidatus Carsonella ruddii	33	1	0	0	0
Pseudomonas entomophila L48	33	0	0	0	1
Halorhodospira halochloris	33	0	2	0	0
Photobacterium profundum SS9	33	0	1	0	0
Acidobacterium capsulatum ATCC 51196	33	0	0	0	0
Halomonas subglaciescola	33	0	0	0	0
Pseudomonas chlororaphis subsp. piscium	33	0	0	0	0
Burkholderia cepacia	32	0	2	1	0
Pseudomonas sp. M30-35	32	0	0	0	1
Litoricola lipolytica	32	0	1	0	0
Buchnera aphidicola (Schlechtendalia chinensis)	32	0	0	0	0
Lactobacillus paraplantarum	32	0	0	0	0
Pseudomonas agarici	32	0	0	0	0
Vibrio alfacsensis	32	0	0	0	0
Staphylococcus aureus subsp. aureus	31	0	2	1	0
Zhongshania aliphaticivorans	31	0	12	0	0
Pseudomonas aeruginosa MTB-1	31	0	0	0	0
Pseudomonas psychrotolerans	31	0	0	0	0
Pseudomonas sp. Os17	31	0	0	0	0
Taylorella asinigenitalis MCE3	31	0	0	0	0
Clostridium tetani	30	4	4	3	5
Klebsiella variicola	30	0	3	1	0
Candidatus Thiodictyon syntrophicum	30	0	0	0	0
Streptomyces rubrolavendulae	29	14	55	49	18
Burkholderia thailandensis 2002721723	29	2	0	0	0
Yersinia pestis 2944	29	0	0	1	0
Yersinia pestis 3770	29	0	2	0	0
Klebsiella oxytoca	29	0	0	0	0
Aeromonas veronii	28	0	9	1	0
Salmonella enterica subsp. enterica serovar Heidelberg str. 41578	28	0	7	0	0
Pseudomonas sp. SWI36	28	0	0	0	0
Raoultella terrigena	27	0	0	1	0
Candidatus Hoaglandella endobia	27	0	3	0	0
Pseudomonas stutzeri group	27	0	1	0	0
Candidatus Enterovibrio luxaltus	27	0	0	0	0
Ectothiorhodospiraceae bacterium BW-2	27	0	0	0	0
Edwardsiella tarda	27	0	0	0	0
Pseudomonas orientalis	27	0	0	0	0
Pseudomonas vancouverensis	27	0	0	0	0
Bacillus cereus group	26	2	1	0	4
Candidatus Evansia muelleri	26	0	0	0	1
Geoalkalibacter subterraneus	26	0	0	0	1
Sulfuricurvum kujiense DSM 16994	26	0	3	0	0
Aeromonas salmonicida	26	0	2	0	0
Gynuella sunshinyii YC6258	26	0	1	0	0
Steroidobacter denitrificans	26	0	1	0	0
Azospirillum brasilense Sp245	26	0	0	0	0
Pantoea eucalypti	26	0	0	0	0
Pseudomonas aeruginosa YL84	26	0	0	0	0
Pseudomonas rhizosphaerae	26	0	0	0	0
Serratia symbiotica	25	0	0	1	0
Enterobacter kobei	25	0	2	0	0
Kushneria konosiri	25	0	0	0	0
Thalassotalea crassostreae	25	0	0	0	0
Devosia ginsengisoli	24	3	0	0	0
Candidatus Hepatoplasma crinochetorum Av	24	0	4	1	0
Aeromonas hydrophila	24	0	2	0	0
Aquicella siphonis	24	0	0	0	0
Halomonas beimenensis	24	0	0	0	0
Lactobacillus acidophilus NCFM	24	0	0	0	0
Pseudomonas chlororaphis subsp. chlororaphis	24	0	0	0	0
Vibrio vulnificus	24	0	0	0	0
Klebsiella sp. LY	23	18	17	20	6
Streptomyces sp. C8S0	23	0	3	1	0
Pseudomonas mucidolens	23	0	1	0	0
Mannheimia haemolytica	23	0	0	0	0
Sulfuritalea hydrogenivorans sk43H	23	0	0	0	0
Vibrio harveyi	23	0	0	0	0
Nostoc sp. NIES-4103	22	8	7	4	4
Candidatus Promineofilum breve	22	0	30	53	1
secondary endosymbiont of Trabutina mannipara	22	0	1	0	0
Aeromonas salmonicida subsp. salmonicida	22	0	0	0	0
Candidatus Annandia adelgestsuga	22	0	0	0	0
Pseudomonas aeruginosa c7447m	22	0	0	0	0
Pseudomonas fluorescens Q8r1-96	22	0	0	0	0
Streptomyces sp. M2	21	10	14	13	8
Ketobacter alkanivorans	21	0	0	0	1
Vibrio cholerae M66-2	21	0	3	0	0
Pseudomonas poae RE*1-1-14	21	0	0	0	0
Bacillus cereus m1293	20	32	70	20	270
Pseudomonas sp. R32	20	4	0	3	0
Acinetobacter venetianus VE-C3	20	1	33	0	0
Enterobacter bugandensis	20	0	4	0	0
Acinetobacter baumannii AYE	20	0	2	0	0
Haemophilus influenzae	20	0	1	0	0
Burkholderia thailandensis H0587	20	0	0	0	0
Francisella tularensis subsp. holarctica	20	0	0	0	0
Mycoplasma dispar	20	0	0	0	0
Symbiobacterium thermophilum IAM 14863	20	0	0	0	0
Vibrio coralliilyticus	19	1	0	0	0
Stenotrophomonas maltophilia D457	19	0	4	0	0
Wigglesworthia glossinidia endosymbiont of Glossina brevipalpis	19	0	2	0	0
Moraxella ovis	19	0	0	0	0
Pantoea sp. CCBC3-3-1	19	0	0	0	0
Pectobacterium carotovorum subsp. carotovorum PCC21	19	0	0	0	0
Taylorella equigenitalis ATCC 35865	18	2	0	0	0
Nitrosococcus halophilus Nc 4	18	0	0	1	1
Buttiauxella sp. 3AFRM03	18	0	0	0	1
Salmonella enterica subsp. enterica serovar Bareilly str. CFSAN000661	18	0	10	0	0
gamma proteobacterium HdN1	18	0	2	0	0
Legionella geestiana	18	0	2	0	0
Escherichia coli O157:H7 str. EDL933	18	0	0	0	0
Oleispira antarctica RB-8	18	0	0	0	0
Pseudomonas aeruginosa PACS2	18	0	0	0	0
Pseudomonas knackmussii	18	0	0	0	0
Pseudomonas sp. UW4	18	0	0	0	0
Candidatus Erwinia haradaeae	17	1	4	0	1
secondary endosymbiont of Heteropsylla cubana	17	0	0	0	1
Burkholderia mallei	17	0	0	0	0
Candidatus Ishikawaella capsulata Mpkobe	17	0	0	0	0
Enterobacter cloacae complex sp.	17	0	0	0	0
gamma proteobacterium SS-5	17	0	0	0	0
Pistricoccus aurantiacus	17	0	0	0	0
Pseudomonas brassicacearum subsp. brassicacearum NFM421	17	0	0	0	0
Sulfurovum sp. NBC37-1	17	0	0	0	0
Vibrio anguillarum	17	0	0	0	0
Pseudohongiella spirulinae	16	1	0	0	0
Candidatus Purcelliella pentastirinorum	16	0	2	2	0
Shigella flexneri 2002017	16	0	1	0	0
Pseudomonas pelagia	16	0	0	0	0
Mycobacterium simiae	15	4	23	30	2
Rhodothermus marinus	15	1	1	1	0
Pseudomonas mendocina	15	0	1	1	0
Idiomarina sp. OT37-5b	15	0	1	0	0
Bordetella sp. HZ20	15	0	0	0	0
Mycobacterium tuberculosis	15	0	0	0	0
Nitrosococcus wardiae	15	0	0	0	0
Pseudomonas brenneri	15	0	0	0	0
Rickettsia raoultii	15	0	0	0	0
Candidatus Gracilibacteria bacterium HOT-871	14	2	0	0	1
Paenibacillus polymyxa CR1	14	0	3	0	0
Arsenophonus endosymbiont of Aleurodicus dispersus	14	0	0	0	0
Desulfurobacterium thermolithotrophum DSM 11699	14	0	0	0	0
Pseudomonas aeruginosa PA7	14	0	0	0	0
Pseudomonas silesiensis	14	0	0	0	0
Wenzhouxiangella marina	14	0	0	0	0
Sorangium cellulosum	13	1	6	2	5
Bacillus subtilis	13	1	1	1	1
Tissierellia sp. JN-28	13	0	0	3	0
Methylomicrobium album BG8	13	0	0	1	0
Desulfomonile tiedjei DSM 6799	13	0	1	0	0
Alcanivorax pacificus W11-5	13	0	0	0	0
Alkalilimnicola ehrlichii MLHE-1	13	0	0	0	0
Leclercia adecarboxylata	13	0	0	0	0
Marinobacterium aestuarii	13	0	0	0	0
Pseudomonas aeruginosa SCV20265	13	0	0	0	0
Pseudomonas marincola	13	0	0	0	0
Strawberry lethal yellows phytoplasma (CPA) str. NZSb11	13	0	0	0	0
Yersinia intermedia	13	0	0	0	0
Yersinia pestis str. Pestoides B	13	0	0	0	0
Ottowia oryzae	12	8	0	2	0
Planctomycetes bacterium SRT547	12	1	1	0	0
Xenorhabdus bovienii	12	0	1	1	0
Sinimarinibacterium sp. NLF-5-8	12	0	6	0	2
Pseudomonas sp. CC6-YY-74	12	0	0	0	1
Streptomyces cattleya NRRL 8057 = DSM 46488	12	0	1	0	0
Xenorhabdus nematophila ATCC 19061	12	0	1	0	0
Candidatus Liberibacter asiaticus str. gxpsy	12	0	0	0	0
Moritella marina ATCC 15381	12	0	0	0	0
Permianibacter aggregans	12	0	0	0	0
Pseudomonas aeruginosa PAO1	12	0	0	0	0
Truepera radiovictrix DSM 17093	11	4	2	0	5
Clostridioides difficile	11	2	2	2	1
Bacillus altitudinis	11	1	0	0	0
Pseudomonas putida DOT-T1E	11	1	0	0	0
Paracoccus jeotgali	11	0	2	1	14
Bacillus amyloliquefaciens	11	0	1	0	1
Moraxellaceae bacterium HYN0046	11	0	6	0	0
Pseudoalteromonas piscicida	11	0	4	0	0
Nocardiopsis gilva YIM 90087	11	0	3	0	0
Legionella endosymbiont of Polyplax serrata	11	0	1	0	0
Methylocaldum marinum	11	0	1	0	0
Methylophaga frappieri	11	0	1	0	0
Candidatus Walczuchella monophlebidarum	11	0	0	0	0
Idiomarina loihiensis	11	0	0	0	0
Lysobacter maris	11	0	0	0	0
Pseudomonas aeruginosa LES400	11	0	0	0	0
Pseudomonas aeruginosa PA96	11	0	0	0	0
Streptomyces pratensis ATCC 33331	11	0	0	0	0
Clostridium botulinum	10	2	2	7	4
Acinetobacter johnsonii	10	2	178	2	2
Legionella waltersii	10	1	0	0	0
Streptococcus anginosus group	10	0	0	5	0
Paracoccus sp. SC2-6	10	0	0	1	30
Candidatus Phycorickettsia trachydisci	10	0	3	0	0
Pseudomonas aeruginosa LESlike4	10	0	1	0	0
Acidithiobacillus ferrivorans	10	0	0	0	0
Enterobacteriaceae bacterium strain FGI 57	10	0	0	0	0
Pseudomonas amygdali pv. lachrymans str. M301315	10	0	0	0	0
Pseudomonas sp. SCB32	10	0	0	0	0
Pseudomonas stutzeri A1501	10	0	0	0	0
Vibrio natriegens	10	0	0	0	0
Neisseria gonorrhoeae	9	1	8	7	0
Candidatus Cloacimonas acidaminovorans str. Evry	9	1	0	0	1
Gillisia sp. Hel1_33_143	9	1	0	0	1
Burkholderia cenocepacia	9	1	1	0	0
Candidatus Coxiella mudrowiae	9	1	0	0	0
Actinomyces pacaensis	9	0	1	5	3
Paenibacillus polymyxa	9	0	1	1	0
Clostridium acetobutylicum	9	0	1	0	0
Psychroflexus torquis ATCC 700755	9	0	1	0	0
Thauera aromatica K172	9	0	1	0	0
bacterium 2013Arg42i	9	0	0	0	0
Corynebacterium glutamicum SCgG2	9	0	0	0	0
Erwinia amylovora CFBP1430	9	0	0	0	0
Leclercia sp. LSNIH1	9	0	0	0	0
Pseudomonas aeruginosa 39016	9	0	0	0	0
Thalassolituus oleivorans	9	0	0	0	0
Moraxella osloensis	8	17	37	40	103
Acinetobacter radioresistens	8	4	4	0	0
Planktothrix agardhii NIVA-CYA 126/8	8	2	3	0	1
Helicobacter pylori	8	0	1	1	1
Weissella cryptocerci	8	0	0	1	0
Brachyspira murdochii DSM 12563	8	0	0	0	1
Acidiferrobacter sp. SPIII_3	8	0	1	0	0
Chloracidobacterium thermophilum B	8	0	1	0	0
Bacillus cereus ATCC 4342	8	0	0	0	0
Candidatus Methylospira mobilis	8	0	0	0	0
Clostridioides difficile M68	8	0	0	0	0
endosymbiont of Sipalinus gigas	8	0	0	0	0
Klebsiella pneumoniae subsp. pneumoniae KPNIH10	8	0	0	0	0
Nitratifractor salsuginis DSM 16511	8	0	0	0	0
Pseudomonas cerasi	8	0	0	0	0
Raoultella ornithinolytica	8	0	0	0	0
Methylobacterium aquaticum	7	2	6	6	1
Moraxella bovis	7	1	5	0	0
Pseudomonas antarctica	7	0	0	1	0
Paracoccus contaminans	7	0	2	0	3
Rhizobium sp. 11515TR	7	0	0	0	1
Enterococcus faecium	7	0	2	0	0
Hydrocarboniclastica marina	7	0	1	0	0
Aeromonas media WS	7	0	0	0	0
Anaplasma marginale	7	0	0	0	0
Candidatus Bipolaricaulis anaerobius	7	0	0	0	0
Citrobacter braakii	7	0	0	0	0
Haemophilus influenzae 86-028NP	7	0	0	0	0
Idiomarinaceae bacterium HL-53	7	0	0	0	0
Lactobacillus vaginalis	7	0	0	0	0
Limnobaculum parvum	7	0	0	0	0
Pseudomonas aeruginosa DK2	7	0	0	0	0
Salmonella sp. SSDFZ54	7	0	0	0	0
Thermodesulfobacterium geofontis OPF15	7	0	0	0	0
Thiocystis violascens DSM 198	7	0	0	0	0
Vibrio owensii	7	0	0	0	0
Spirochaeta thermophila DSM 6192	6	5	0	3	0
Labilithrix luteola	6	2	17	1	4
Sporosarcina pasteurii	6	1	0	0	2
Verrucosispora maris AB-18-032	6	1	0	0	0
Salinivibrio kushneri	6	0	2	3	3
Acinetobacter indicus	6	0	43	0	1
Desulfurispirillum indicum S5	6	0	2	0	0
Salmonella enterica subsp. enterica serovar Montevideo str. USDA-ARS-USMARC-1904	6	0	1	0	0
Tepidanaerobacter acetatoxydans Re1	6	0	1	0	0
Vibrio rumoiensis	6	0	1	0	0
Aliivibrio wodanis	6	0	0	0	0
Bifidobacterium breve JCM 7017	6	0	0	0	0
Candidatus Nitrosoglobus terrae	6	0	0	0	0
Coxiella burnetii	6	0	0	0	0
Halomonas sp. Y2R2	6	0	0	0	0
Morganella morganii	6	0	0	0	0
Pseudomonas aeruginosa PA1R	6	0	0	0	0
Pseudomonas fluorescens group	6	0	0	0	0
Serratia plymuthica RVH1	6	0	0	0	0
Suicoccus acidiformans	6	0	0	0	0
Vibrio tubiashii ATCC 19109	6	0	0	0	0
Xenorhabdus poinarii G6	6	0	0	0	0
Bordetella bronchiseptica	5	28	3	13	11
Halothermothrix orenii H 168	5	2	0	0	0
Ilumatobacter coccineus YM16-304	5	1	1	2	7
Caldilinea aerophila DSM 14535 = NBRC 104270	5	1	3	0	0
Lactiplantibacillus plantarum	5	1	0	0	0
Prevotella oris	5	0	0	15649	0
Prevotella melaninogenica	5	0	0	5863	0
Corynebacterium terpenotabidum Y-11	5	0	1	2	0
Chlamydia pecorum MC/MarsBar	5	0	0	1	0
Pseudomonas syringae group	5	0	3	0	0
Pseudomonas nitroreducens	5	0	1	0	0
Alteromonas macleodii	5	0	0	0	0
Bordetella holmesii	5	0	0	0	0
Burkholderia pseudomallei MSHR511	5	0	0	0	0
Candidatus Pelagibacter sp. IMCC9063	5	0	0	0	0
Candidatus Tachikawaea gelatinosa	5	0	0	0	0
Colwellia sp. MT41	5	0	0	0	0
Enterococcus faecalis D32	5	0	0	0	0
Francisella philomiragia subsp. philomiragia ATCC 25015	5	0	0	0	0
Fusobacterium nucleatum subsp. vincentii ChDC F8	5	0	0	0	0
Microcystis sp. MC19	5	0	0	0	0
Nitrosococcus watsonii C-113	5	0	0	0	0
Pseudomonas protegens	5	0	0	0	0
Pseudomonas sp. SWI7	5	0	0	0	0
Rhodococcus pyridinivorans	5	0	0	0	0
Streptococcus sanguinis SK36	5	0	0	0	0
Vibrio parahaemolyticus 10329	5	0	0	0	0
Weissella ceti	5	0	0	0	0
Variovorax sp. HW608	4	12	1	0	0
Streptomyces lydicus	4	5	2	8	0
Orientia tsutsugamushi	4	2	1	0	0
Shewanella psychrophila	4	1	1	0	1
Burkholderia sp. KK1	4	1	1	0	0
Haemophilus parainfluenzae	4	0	2	8	1
Kirsten murine sarcoma virus	4	0	1	6	0
Spleen focus-forming virus	4	0	0	3	0
Limnoglobus roseus	4	0	2	1	0
Calothrix sp. PCC 6303	4	0	0	0	1
Sphingomonas sp. PAMC26645	4	0	0	0	1
Maritalea myrionectae	4	0	6	0	0
Granulosicoccus antarcticus IMCC3135	4	0	2	0	0
Acidihalobacter prosperus	4	0	1	0	0
Cupriavidus taiwanensis LMG 19424	4	0	1	0	0
Desulfovibrio carbinolicus	4	0	1	0	0
Lactobacillus pentosus	4	0	1	0	0
Oceanicoccus sagamiensis	4	0	1	0	0
Salinisphaera sp. LB1	4	0	1	0	0
Amycolatopsis orientalis	4	0	0	0	0
Bacillus thuringiensis MC28	4	0	0	0	0
Candidatus Mancarchaeum acidiphilum	4	0	0	0	0
Lactococcus sp. KACC 19320	4	0	0	0	0
Methylophaga nitratireducenticrescens	4	0	0	0	0
Neokomagataea sp. Ha5	4	0	0	0	0
Oleiphilus messinensis	4	0	0	0	0
Pseudomonas aeruginosa VRFPA04	4	0	0	0	0
Pseudomonas sp. B10	4	0	0	0	0
Pseudomonas syringae pv. syringae B728a	4	0	0	0	0
Shewanella polaris	4	0	0	0	0
Staphylococcus sp. AntiMn-1	4	0	0	0	0
Sulfuriflexus mobilis	4	0	0	0	0
Thiomonas intermedia	4	0	0	0	0
Vibrio campbellii ATCC BAA-1116	4	0	0	0	0
Bradyrhizobium sp. ORS 278	3	6	0	5	6
Burkholderia vietnamiensis	3	3	0	0	0
Candidatus Tremblaya princeps	3	3	0	0	0
Microbulbifer hydrolyticus	3	2	1	2	7
Bordetella parapertussis	3	2	0	0	0
Clostridium beijerinckii	3	2	0	0	0
Micromonospora krabiensis	3	2	0	0	0
Treponema brennaborense DSM 12168	3	1	2	3	1
Mariprofundus aestuarium	3	1	2	3	0
Bacillus pseudomycoides	3	1	0	2	0
Gemmatirosa kalamazoonesis	3	1	4	0	2
Dehalococcoides mccartyi	3	1	3	0	1
Streptomyces albus	3	1	2	0	1
Hymenobacter sedentarius	3	1	4	0	0
Mus musculus mobilized endogenous polytropic provirus	3	0	2	4	0
Massilia umbonata	3	0	3	3	2
Mycolicibacillus koreensis	3	0	4	2	1
[Eubacterium] cellulosolvens 6	3	0	1	1	0
Bifidobacterium longum	3	0	0	1	0
Enterobacter cloacae	3	0	0	1	0
Ktedonosporobacter rubrisoli	3	0	1	0	1
Desulfallas gibsoniae DSM 7213	3	0	0	0	1
Nitrosomonas communis	3	0	0	0	1
Pseudomonas stutzeri RCH2	3	0	0	0	1
Sulfuricaulis limicola	3	0	0	0	1
Yersinia pestis A1122	3	0	7	0	0
Edwardsiella ictaluri	3	0	2	0	0
Chryseobacterium sp. StRB126	3	0	1	0	0
Phenylobacterium zucineum HLK1	3	0	1	0	0
Pragia fontium	3	0	1	0	0
Pseudomonas sp. CCOS 191	3	0	1	0	0
Salmonella enterica subsp. houtenae str. ATCC BAA-1581	3	0	1	0	0
Sutterella megalosphaeroides	3	0	1	0	0
Yersinia pestis 1413	3	0	1	0	0
Aeromonas hydrophila 4AK4	3	0	0	0	0
Aggregatibacter actinomycetemcomitans HK1651	3	0	0	0	0
Alteromonas mediterranea 615	3	0	0	0	0
Bacillus amyloliquefaciens KHG19	3	0	0	0	0
Brevibacillus laterosporus DSM 25	3	0	0	0	0
Campylobacter jejuni subsp. jejuni 81-176	3	0	0	0	0
Candidatus Moranella endobia	3	0	0	0	0
Candidatus Uzinura diaspidicola str. ASNER	3	0	0	0	0
Denitrobacterium detoxificans	3	0	0	0	0
Denitrovibrio acetiphilus DSM 12809	3	0	0	0	0
Enterococcus faecalis OG1RF	3	0	0	0	0
Escherichia coli M12	3	0	0	0	0
Frateuria aurantia DSM 6220	3	0	0	0	0
Fuerstia marisgermanicae	3	0	0	0	0
Klebsiella quasipneumoniae	3	0	0	0	0
Klebsiella variicola At-22	3	0	0	0	0
Lactobacillus paracasei	3	0	0	0	0
Litorilituus sediminis	3	0	0	0	0
Marinomonas mediterranea MMB-1	3	0	0	0	0
Microvirgula aerodenitrificans	3	0	0	0	0
Mycoplasma alkalescens	3	0	0	0	0
Planctomycetes bacterium Q31a	3	0	0	0	0
Pseudarthrobacter sp. NIBRBAC000502772	3	0	0	0	0
Pseudoalteromonas sp. 1_2015MBL_MicDiv	3	0	0	0	0
Pseudomonas alcaligenes	3	0	0	0	0
Pseudomonas putida S13.1.2	3	0	0	0	0
Pseudomonas sp. R11-23-07	3	0	0	0	0
Pseudomonas sp. TMW 2.1634	3	0	0	0	0
Roseitalea porphyridii	3	0	0	0	0
Serratia marcescens	3	0	0	0	0
Streptococcus thermophilus TH1477	3	0	0	0	0
Torque teno virus 22	3	0	0	0	0
Kosmotoga olearia TBF 19.5.1	2	42	1	0	0
Cupriavidus taiwanensis	2	12	1	2	2
Terasakiella sp. SH-1	2	5	5	5	1
Methylobacterium currus	2	5	0	0	5
Chryseobacterium gleum	2	3	0	1	2
Streptomyces venezuelae	2	2	0	2	0
Bradyrhizobium erythrophlei	2	2	0	0	4
Burkholderia pseudomallei NCTC 13179	2	2	4	0	0
Vibrio aphrogenes	2	2	1	0	0
Streptomyces sp. S4.7	2	1	1	1	1
Streptococcus mutans	2	1	1	1	0
Thermoanaerobacterium sp. RBIITD	2	1	0	1	0
Sphingomonas panacis	2	1	99	0	1
Streptomyces sp. QMT-28	2	1	1	0	1
Belliella baltica DSM 15883	2	1	0	0	1
Streptomyces sp. TLI_053	2	1	0	0	1
Frankia inefficax	2	1	3	0	0
Streptomyces ficellus	2	1	2	0	0
Wigglesworthia glossinidia endosymbiont of Glossina morsitans morsitans (Yale colony)	2	1	1	0	0
Acidovorax cattleyae	2	1	0	0	0
Blochmannia endosymbiont of Camponotus (Colobopsis) obliquus	2	1	0	0	0
Lactobacillus amylovorus	2	1	0	0	0
Thiobacillus denitrificans ATCC 25259	2	1	0	0	0
Vibrio sp. 2521-89	2	1	0	0	0
Faecalibacterium prausnitzii	2	0	0	21	0
Staphylococcus epidermidis	2	0	0	6	2
Acinetobacter junii	2	0	7	5	0
Brevibacillus laterosporus	2	0	0	2	2
Lysinibacillus timonensis	2	0	0	2	0
Actinomyces sp. oral taxon 414	2	0	1	1	1
Microvirga ossetica	2	0	0	1	1
Streptomyces sp. CMB-StM0423	2	0	3	1	0
Streptomyces anulatus	2	0	2	1	0
Pseudomonas sp. URMO17WK12:I11	2	0	1	1	0
Streptomyces sp. RTd22	2	0	1	1	0
Streptomyces tendae	2	0	1	1	0
Anaerohalosphaera lusitana	2	0	0	1	0
Calothrix sp. 336/3	2	0	0	1	0
Kushneria sp. YCWA18	2	0	0	1	0
Methylobacterium mesophilicum SR1.6/6	2	0	0	1	0
Methylotenera versatilis 301	2	0	0	1	0
Pseudomonas sp. HLS-6	2	0	0	1	0
Vibrio alginolyticus	2	0	0	1	0
Deinococcus geothermalis	2	0	3	0	3
Nakamurella panacisegetis	2	0	2	0	3
Zymobacter palmae	2	0	0	0	2
Lysobacter sp. TY2-98	2	0	5	0	1
Planctomycetes bacterium ETA_A1	2	0	2	0	1
Chroococcidiopsis thermalis PCC 7203	2	0	1	0	1
Paracoccus zhejiangensis	2	0	1	0	1
Vibrio sp. SM1977	2	0	1	0	1
Tatumella sp. TA1	2	0	0	0	1
Xylella fastidiosa	2	0	5	0	0
Methylococcus capsulatus str. Bath	2	0	4	0	0
Yersinia enterocolitica	2	0	4	0	0
Arenimonas daejeonensis	2	0	3	0	0
Methylobacterium sp. 17Sr1-43	2	0	2	0	0
Salmonella enterica subsp. enterica serovar Bareilly str. CFSAN000669	2	0	2	0	0
Agromyces flavus	2	0	1	0	0
Clavibacter michiganensis subsp. nebraskensis	2	0	1	0	0
Histophilus somni	2	0	1	0	0
Hydrogenophaga sp. PAMC20947	2	0	1	0	0
Methanosarcina barkeri	2	0	1	0	0
Peptoniphilus harei	2	0	1	0	0
Streptomyces davaonensis JCM 4913	2	0	1	0	0
Teredinibacter turnerae T7901	2	0	1	0	0
Xanthomonas euvesicatoria pv. alfalfae CFBP 3836	2	0	1	0	0
Acetohalobium arabaticum DSM 5501	2	0	0	0	0
Aeromonas rivipollensis	2	0	0	0	0
Anaerolineaceae bacterium oral taxon 439	2	0	0	0	0
Anaerolinea thermophila UNI-1	2	0	0	0	0
Arcobacter butzleri	2	0	0	0	0
Arcobacter mytili LMG 24559	2	0	0	0	0
Bacillus anthracis str. Turkey32	2	0	0	0	0
Bacillus subtilis subsp. subtilis	2	0	0	0	0
Bacillus thuringiensis serovar kurstaki str. HD73	2	0	0	0	0
Bartonella bovis 91-4	2	0	0	0	0
Buchnera aphidicola (Cinara tujafilina)	2	0	0	0	0
Buchnera aphidicola (Nipponaphis monzeni)	2	0	0	0	0
Buchnera aphidicola (Thelaxes californica)	2	0	0	0	0
Burkholderia thailandensis USAMRU Malaysia #20	2	0	0	0	0
Candidatus Microgenomates bacterium	2	0	0	0	0
Candidatus Thioglobus autotrophicus	2	0	0	0	0
Clostridium botulinum BKT015925	2	0	0	0	0
Coxiella burnetii Dugway 5J108-111	2	0	0	0	0
Desulfocapsa sulfexigens DSM 10523	2	0	0	0	0
Desulfococcus multivorans	2	0	0	0	0
Dickeya dadantii NCPPB 3537	2	0	0	0	0
Dickeya zeae	2	0	0	0	0
Endozoicomonas montiporae CL-33	2	0	0	0	0
Enterococcus hirae	2	0	0	0	0
Entomomonas moraniae	2	0	0	0	0
Escherichia coli W	2	0	0	0	0
Ferrimonas balearica DSM 9799	2	0	0	0	0
Flammeovirga sp. MY04	2	0	0	0	0
Jeongeupia sp. USM3	2	0	0	0	0
Kineobactrum sp. M2	2	0	0	0	0
Lactobacillus acidophilus	2	0	0	0	0
Lactobacillus mucosae LM1	2	0	0	0	0
Leclercia sp. 1106151	2	0	0	0	0
Marinobacter sp. Arc7-DN-1	2	0	0	0	0
Mariprofundus ferrinatatus	2	0	0	0	0
Methanobacterium sp. MB1	2	0	0	0	0
Methylomonas sp. GJ1	2	0	0	0	0
Micromonospora zamorensis	2	0	0	0	0
Mycoplasma canadense	2	0	0	0	0
Neisseria gonorrhoeae FA 1090	2	0	0	0	0
Oceanimonas sp. GK1	2	0	0	0	0
Otariodibacter oris	2	0	0	0	0
Paenibacillus physcomitrellae	2	0	0	0	0
Pandoraea pulmonicola	2	0	0	0	0
Pediococcus inopinatus	2	0	0	0	0
Phaeobacter gallaeciensis	2	0	0	0	0
Planococcus sp. Y42	2	0	0	0	0
Proteus vulgaris	2	0	0	0	0
Providencia stuartii	2	0	0	0	0
Pseudomonas cichorii JBC1	2	0	0	0	0
Pseudomonas fragi	2	0	0	0	0
Pseudomonas resinovorans NBRC 106553	2	0	0	0	0
Pseudomonas sp. 02C 26	2	0	0	0	0
Pseudomonas sp. LBUM920	2	0	0	0	0
Pseudomonas sp. SNU WT1	2	0	0	0	0
Rhodoferax antarcticus	2	0	0	0	0
Salmonella bongori CFSAN000510	2	0	0	0	0
Salmonella enterica subsp. enterica serovar Agona str. 24249	2	0	0	0	0
Shewanella baltica OS183	2	0	0	0	0
Shewanella sp. ANA-3	2	0	0	0	0
Spirochaeta thermophila	2	0	0	0	0
Streptococcus suis JS14	2	0	0	0	0
Streptococcus thermophilus LMD-9	2	0	0	0	0
Streptococcus thermophilus ND03	2	0	0	0	0
Streptomyces chartreusis NRRL 3882	2	0	0	0	0
Synechococcus sp. CB0101	2	0	0	0	0
Tenacibaculum todarodis	2	0	0	0	0
Thermoanaerobacterales bacterium SK-G1	2	0	0	0	0
Thermobispora bispora DSM 43833	2	0	0	0	0
Thiolapillus brandeum	2	0	0	0	0
Tolumonas auensis DSM 9187	2	0	0	0	0
Vagococcus penaei	2	0	0	0	0
Vibrio furnissii	2	0	0	0	0
Vibrio ponticus	2	0	0	0	0
Yersinia kristensenii	2	0	0	0	0
Yersinia pseudotuberculosis PB1/+	2	0	0	0	0
Leptothrix cholodnii SP-6	1	112	2	1	1
Microcystis aeruginosa FD4	1	25	0	0	2
Colwellia sp. 20A7	1	14	3	13	17
[Polyangium] brachysporum	1	13	0	0	2
Rubrivivax gelatinosus IL144	1	10	0	0	1
Ralstonia mannitolilytica	1	8	3	4	18
Corynebacterium segmentosum	1	7	11	11	12
Meiothermus silvanus DSM 9946	1	7	0	0	11
Cupriavidus pauculus	1	7	1	0	2
Bartonella tribocorum	1	5	0	1	0
Blastococcus saxobsidens DD2	1	4	1	1	30
Ralstonia pickettii 12J	1	4	2	0	0
Sideroxydans lithotrophicus ES-1	1	4	0	0	0
Rothia mucilaginosa	1	3	0	6	2
Cohnella abietis	1	3	1	3	1
Halanaerobium hydrogeniformans	1	3	1	2	2
Vitreoscilla filiformis	1	3	2	2	0
Alcaligenes faecalis	1	3	0	2	0
Brachybacterium saurashtrense	1	3	1	1	3
Streptomyces roseochromogenus subsp. oscitans DS 12.976	1	3	0	1	2
Massilia oculi	1	3	1	0	7
Burkholderia pseudomallei	1	3	3	0	0
Hafnia alvei	1	2	0	10	24
Streptomyces olivoreticuli subsp. olivoreticuli	1	2	2	4	0
Acinetobacter lwoffii	1	2	5	3	1
Citrobacter freundii	1	2	0	3	0
Shinella sp. HZN7	1	2	1	1	0
Bordetella hinzii	1	2	1	0	2
Burkholderiales bacterium JOSHI_001	1	2	2	0	1
Marmoricola scoriae	1	2	1	0	1
Pseudolysobacter antarcticus	1	2	10	0	0
Burkholderia stabilis	1	2	2	0	0
Actinoplanes teichomyceticus ATCC 31121	1	2	1	0	0
Azospira oryzae PS	1	2	1	0	0
Brachybacterium ginsengisoli	1	2	0	0	0
Fusobacterium varium	1	1	0	9	1
Bernardetia litoralis DSM 6794	1	1	2	3	1
Corynebacterium aurimucosum ATCC 700975	1	1	1	2	1
Methylobacterium sp. 4-46	1	1	1	2	0
Mucilaginibacter mallensis	1	1	1	1	3
Cohaesibacter sp. ES.047	1	1	0	1	0
Lactobacillus hilgardii	1	1	0	1	0
Pontibacillus sp. HMF3514	1	1	0	1	0
Anaerococcus prevotii DSM 20548	1	1	1	0	4
Herbaspirillum seropedicae	1	1	1	0	2
Massilia violaceinigra	1	1	1	0	2
Chryseobacterium indologenes	1	1	0	0	2
Chryseobacterium taklimakanense	1	1	0	0	2
Dietzia psychralcaliphila	1	1	0	0	2
Geminocystis sp. NIES-3709	1	1	0	0	2
Lactobacillus salivarius	1	1	0	0	2
Burkholderia cepacia complex	1	1	3	0	1
Francisella frigiditurris	1	1	3	0	1
Agromyces sp. LHK192	1	1	0	0	1
Streptomyces exfoliatus	1	1	0	0	1
Kiritimatiellaeota bacterium S-5007	1	1	2	0	0
Apibacter raozihei	1	1	1	0	0
Lactobacillus helveticus	1	1	1	0	0
Limnochorda pilosa	1	1	1	0	0
Xanthomonas citri	1	1	1	0	0
Zunongwangia profunda SM-A87	1	1	1	0	0
Zymomonas mobilis	1	1	1	0	0
Arcobacter molluscorum LMG 25693	1	1	0	0	0
Azospirillum brasilense	1	1	0	0	0
Bacillus cereus 03BB108	1	1	0	0	0
Bordetella genomosp. 9	1	1	0	0	0
Burkholderia thailandensis E264	1	1	0	0	0
Candidatus Prometheoarchaeum syntrophicum	1	1	0	0	0
Catenovulum sp. CCB-QB4	1	1	0	0	0
Clostridium argentinense	1	1	0	0	0
Corynebacterium xerosis	1	1	0	0	0
Denitratisoma sp. DHT3	1	1	0	0	0
Euzebyella marina	1	1	0	0	0
Fischerella sp. NIES-4106	1	1	0	0	0
Flavobacterium columnare	1	1	0	0	0
Halobacteroides halobius DSM 5150	1	1	0	0	0
Lactobacillus ginsenosidimutans	1	1	0	0	0
Lactococcus raffinolactis	1	1	0	0	0
Micromonospora coxensis	1	1	0	0	0
Micromonospora viridifaciens	1	1	0	0	0
Mycoplasma canis	1	1	0	0	0
Nocardia terpenica	1	1	0	0	0
Paenibacillus antarcticus	1	1	0	0	0
Paraglaciecola sp. L3A3	1	1	0	0	0
Phycisphaera mikurensis NBRC 102666	1	1	0	0	0
Pseudomonas putida NBRC 14164	1	1	0	0	0
Pseudomonas putida W619	1	1	0	0	0
Pseudomonas rhodesiae	1	1	0	0	0
Pseudomonas sihuiensis	1	1	0	0	0
Pseudomonas simiae	1	1	0	0	0
Staphylococcus haemolyticus	1	1	0	0	0
Streptomyces atratus	1	1	0	0	0
Streptomyces pactum	1	1	0	0	0
Streptomyces violaceoruber	1	1	0	0	0
Sulfuricella denitrificans skB26	1	1	0	0	0
Tenacibaculum sp. SZ-18	1	1	0	0	0
Terriglobus roseus DSM 18391	1	1	0	0	0
Vagococcus sp. MN-17	1	1	0	0	0
Variovorax sp. PMC12	1	1	0	0	0
Yersinia hibernica	1	1	0	0	0
Parvimonas micra	1	0	0	1186	0
Neisseria flavescens	1	0	0	703	0
Lachnoclostridium phytofermentans ISDg	1	0	0	40	0
Streptococcus anginosus	1	0	0	40	0
Dehalobacter restrictus	1	0	0	11	0
Lawsonella clevelandensis	1	0	8	5	21
Listeria monocytogenes	1	0	0	4	4
Nocardia cyriacigeorgica	1	0	0	4	0
Streptococcus mitis	1	0	0	4	0
Agromyces sp. KACC 19306	1	0	3	3	2
Microbacterium lemovicicum	1	0	2	3	1
Methylobacillus flagellatus KT	1	0	0	3	0
Chondromyces crocatus	1	0	1	2	6
Pseudomonas tolaasii	1	0	40	2	1
Streptomyces albidoflavus	1	0	0	2	1
Jeotgalibaca sp. PTS2502	1	0	0	2	0
Mycobacterium colombiense CECT 3035	1	0	0	2	0
Niveispirillum cyanobacteriorum	1	0	0	2	0
Hymenobacter sp. APR13	1	0	4	1	5
Haliangium ochraceum DSM 14365	1	0	4	1	2
Streptomyces sp. SAT1	1	0	0	1	2
Verrucomicrobium spinosum DSM 4136 = JCM 18804	1	0	4	1	1
Brachybacterium sp. SGAir0954	1	0	0	1	1
Staphylococcus equorum	1	0	0	1	1
Streptacidiphilus bronchialis	1	0	0	1	1
Bifidobacterium animalis subsp. lactis KLDS2.0603	1	0	1	1	0
Chryseobacterium haifense	1	0	1	1	0
Jannaschia sp. CCS1	1	0	1	1	0
Kutzneria albida DSM 43870	1	0	1	1	0
Peptacetobacter hiranonis	1	0	1	1	0
Phycisphaerae bacterium RAS2	1	0	1	1	0
Streptomyces griseus subsp. griseus	1	0	1	1	0
Streptomyces sp. Go-475	1	0	1	1	0
Calothrix brevissima NIES-22	1	0	0	1	0
Candidatus Arthromitus sp. SFB-rat-Yit	1	0	0	1	0
Castellaniella defragrans 65Phen	1	0	0	1	0
Clostridium kluyveri	1	0	0	1	0
Corynebacterium glaucum	1	0	0	1	0
Deinococcus radiodurans	1	0	0	1	0
endosymbiont of Rhynchophorus ferrugineus	1	0	0	1	0
Escherichia coli TW10598	1	0	0	1	0
Flavobacterium nackdongense	1	0	0	1	0
Hathewaya histolytica	1	0	0	1	0
Komagataeibacter xylinus E25	1	0	0	1	0
Mycolicibacterium goodii	1	0	0	1	0
Neoasaia chiangmaiensis	1	0	0	1	0
Nitrosomonas ureae	1	0	0	1	0
Nostoc sp. 'Lobaria pulmonaria (5183) cyanobiont'	1	0	0	1	0
Rubrobacter radiotolerans	1	0	0	1	0
Staphylococcus capitis	1	0	0	1	0
Streptococcus sobrinus	1	0	0	1	0
Streptomyces ambofaciens	1	0	0	1	0
Streptomyces nitrosporeus	1	0	0	1	0
Thermaerobacter marianensis DSM 12885	1	0	0	1	0
Dermacoccus nishinomiyaensis	1	0	0	0	17
Sanguibacter keddieii DSM 10542	1	0	0	0	17
Cellulomonas sp. Y8	1	0	0	0	11
Roseovarius indicus	1	0	1	0	5
Desulfosarcina alkanivorans	1	0	0	0	4
Paraoceanicella profunda	1	0	1	0	3
Deinococcus gobiensis I-0	1	0	3	0	2
Aeromicrobium sp. A1-2	1	0	0	0	2
Methylobacterium durans	1	0	0	0	2
Paenibacillus mucilaginosus	1	0	0	0	2
Sorangium cellulosum So ce56	1	0	0	0	2
Sphingomonas insulae	1	0	0	0	2
Variibacter gotjawalensis	1	0	2	0	1
Youhaiella tibetensis	1	0	2	0	1
Brevirhabdus pacifica	1	0	1	0	1
Campylobacter jejuni	1	0	1	0	1
Sodalis praecaptivus	1	0	1	0	1
Acidimicrobium ferrooxidans DSM 10331	1	0	0	0	1
Bacillus methanolicus MGA3	1	0	0	0	1
Bacillus sp. FJAT-22090	1	0	0	0	1
Beutenbergia cavernae DSM 12333	1	0	0	0	1
Blastochloris viridis	1	0	0	0	1
Brachyspira intermedia PWS/A	1	0	0	0	1
Calothrix sp. NIES-3974	1	0	0	0	1
Campylobacter cuniculorum DSM 23162 = LMG 24588	1	0	0	0	1
Chryseolinea soli	1	0	0	0	1
Granulicella sp. WH15	1	0	0	0	1
Hirschia baltica ATCC 49814	1	0	0	0	1
Lactobacillus curvatus	1	0	0	0	1
Lactobacillus jensenii	1	0	0	0	1
Lactobacillus sakei	1	0	0	0	1
Lactococcus lactis subsp. lactis	1	0	0	0	1
Legionella anisa	1	0	0	0	1
Methylocystis parvus	1	0	0	0	1
Mycobacterium sp. ELW1	1	0	0	0	1
Nocardioides sp. 78	1	0	0	0	1
Salicibibacter kimchii	1	0	0	0	1
Spiroplasma turonicum	1	0	0	0	1
Sporosarcina ureae	1	0	0	0	1
Streptomyces niveus NCIMB 11891	1	0	0	0	1
Yersinia similis	1	0	0	0	1
Acinetobacter nosocomialis	1	0	128	0	0
Acinetobacter ursingii	1	0	69	0	0
Pseudobacter ginsenosidimutans	1	0	52	0	0
Acinetobacter baylyi ADP1	1	0	14	0	0
Sphingomonas sp. NIC1	1	0	13	0	0
Candidatus Fukatsuia symbiotica	1	0	7	0	0
Flavisolibacter sp. 17J28-1	1	0	6	0	0
Laceyella sacchari	1	0	6	0	0
Chromohalobacter salexigens DSM 3043	1	0	5	0	0
Lysobacter oculi	1	0	5	0	0
Tuwongella immobilis	1	0	5	0	0
Friedmanniella luteola	1	0	4	0	0
Halothiobacillus sp. LS2	1	0	4	0	0
Lactobacillus allii	1	0	4	0	0
Luteimonas yindakuii	1	0	4	0	0
Mesoplasma florum L1	1	0	3	0	0
Verrucomicrobia bacterium IMCC26134	1	0	3	0	0
Aeromicrobium choanae	1	0	2	0	0
Aquiflexum balticum DSM 16537	1	0	2	0	0
Halieaceae bacterium IMCC3088	1	0	2	0	0
Lactobacillus iners	1	0	2	0	0
Listeria sp. PSOL-1	1	0	2	0	0
Mycoplasma anatis	1	0	2	0	0
Nonomuraea sp. ATCC 55076	1	0	2	0	0
Planctomycetales bacterium 10988	1	0	2	0	0
Verrucomicrobium sp. GAS474	1	0	2	0	0
Allofrancisella guangzhouensis	1	0	1	0	0
Bdellovibrio bacteriovorus W	1	0	1	0	0
Bifidobacterium angulatum	1	0	1	0	0
Brevundimonas naejangsanensis	1	0	1	0	0
Calothrix sp. NIES-2098	1	0	1	0	0
Candidatus Pelagibacter sp. RS40	1	0	1	0	0
Candidatus Profftella armatura	1	0	1	0	0
Cellulomonas gilvus ATCC 13127	1	0	1	0	0
Corynebacterium phocae	1	0	1	0	0
Desulfobacterium autotrophicum HRM2	1	0	1	0	0
Halorhodospira halophila SL1	1	0	1	0	0
Ignavibacterium album JCM 16511	1	0	1	0	0
Lacinutrix sp. 5H-3-7-4	1	0	1	0	0
Mesorhizobium australicum WSM2073	1	0	1	0	0
Microbacterium sp. XT11	1	0	1	0	0
Moraxella bovoculi	1	0	1	0	0
Paenibacillus polymyxa SQR-21	1	0	1	0	0
Paracoccus mutanolyticus	1	0	1	0	0
Parageobacillus thermoglucosidasius C56-YS93	1	0	1	0	0
Polaribacter vadi	1	0	1	0	0
Pseudoalteromonas tunicata	1	0	1	0	0
Pseudomonas fluorescens WH6	1	0	1	0	0
Rhodobacter sphaeroides	1	0	1	0	0
Rhodopseudomonas palustris	1	0	1	0	0
Staphylococcus schleiferi	1	0	1	0	0
Streptococcus suis	1	0	1	0	0
Streptomyces albireticuli	1	0	1	0	0
Streptomyces sp. 2323.1	1	0	1	0	0
Thioflavicoccus mobilis 8321	1	0	1	0	0
Ureaplasma parvum	1	0	1	0	0
Vibrio natriegens NBRC 15636 = ATCC 14048 = DSM 759	1	0	1	0	0
Waddlia chondrophila WSU 86-1044	1	0	1	0	0
Yersinia frederiksenii Y225	1	0	1	0	0
Acetobacter oryzoeni	1	0	0	0	0
Acholeplasma axanthum	1	0	0	0	0
Actinobacteria bacterium YIM 96077	1	0	0	0	0
Actinomyces sp. Chiba101	1	0	0	0	0
Aeropyrum pernix K1	1	0	0	0	0
Aggregatibacter aphrophilus NJ8700	1	0	0	0	0
Agrobacterium fabrum	1	0	0	0	0
Alicyclobacillus acidocaldarius subsp. acidocaldarius DSM 446	1	0	0	0	0
Alistipes onderdonkii subsp. vulgaris	1	0	0	0	0
Alteromonas sp. RKMC-009	1	0	0	0	0
Ancylobacter sp. TS-1	1	0	0	0	0
Anoxybacillus sp. PDR2	1	0	0	0	0
Archaeoglobus profundus DSM 5631	1	0	0	0	0
Arcobacter nitrofigilis DSM 7299	1	0	0	0	0
Avibacterium volantium	1	0	0	0	0
Azospirillum thermophilum	1	0	0	0	0
Bacillus amyloliquefaciens group	1	0	0	0	0
Bacillus anthracis str. V770-NP-1R	1	0	0	0	0
Bacillus atrophaeus	1	0	0	0	0
Bacillus ciccensis	1	0	0	0	0
Bacillus lentus	1	0	0	0	0
Bacillus safensis	1	0	0	0	0
Bacillus sp. Lzh-5	1	0	0	0	0
Bacillus weihaiensis	1	0	0	0	0
Beijerinckia indica subsp. indica ATCC 9039	1	0	0	0	0
Betaproteobacteria bacterium GR16-43	1	0	0	0	0
Blochmannia endosymbiont of Camponotus nipponensis	1	0	0	0	0
Bordetella genomosp. 6	1	0	0	0	0
Borreliella valaisiana	1	0	0	0	0
Brachyspira hyodysenteriae ATCC 27164	1	0	0	0	0
Bradyrhizobiaceae bacterium SG-6C	1	0	0	0	0
Brevefilum fermentans	1	0	0	0	0
Calothrix sp. NIES-2100	1	0	0	0	0
Campylobacter helveticus	1	0	0	0	0
Campylobacter insulaenigrae	1	0	0	0	0
candidate division Zixibacteria bacterium	1	0	0	0	0
Candidatus Fokinia solitaria	1	0	0	0	0
Candidatus Izimaplasma sp. HR1	1	0	0	0	0
Candidatus Nesciobacter abundans	1	0	0	0	0
Candidatus Phytoplasma ziziphi	1	0	0	0	0
Candidatus Riesia pediculischaeffi	1	0	0	0	0
Candidatus Ruthia magnifica str. Cm (Calyptogena magnifica)	1	0	0	0	0
Capnocytophaga sp. oral taxon 323	1	0	0	0	0
Carnobacterium maltaromaticum	1	0	0	0	0
Caulobacter segnis	1	0	0	0	0
Chlamydia suis	1	0	0	0	0
Chryseobacterium sp. G0162	1	0	0	0	0
Cloacibacillus porcorum	1	0	0	0	0
Clostridium botulinum H04402 065	1	0	0	0	0
Corynebacterium marinum DSM 44953	1	0	0	0	0
Crinalium epipsammum PCC 9333	1	0	0	0	0
Cupriavidus campinensis	1	0	0	0	0
Curtobacterium sp. SGAir0471	1	0	0	0	0
Cylindrospermum stagnale PCC 7417	1	0	0	0	0
Dechloromonas aromatica RCB	1	0	0	0	0
Defluviitoga tunisiensis	1	0	0	0	0
Desulfatibacillum aliphaticivorans	1	0	0	0	0
Desulfovibrio salexigens DSM 2638	1	0	0	0	0
Desulfurella acetivorans A63	1	0	0	0	0
Egibacter rhizosphaerae	1	0	0	0	0
Elizabethkingia anophelis	1	0	0	0	0
Elizabethkingia miricola	1	0	0	0	0
Enterobacter cloacae subsp. cloacae ATCC 13047	1	0	0	0	0
Enterobacter oligotrophica	1	0	0	0	0
Enterococcus cecorum	1	0	0	0	0
Enterococcus faecalis ATCC 29212	1	0	0	0	0
Enterococcus hirae ATCC 9790	1	0	0	0	0
Escherichia coli Nissle 1917	1	0	0	0	0
Escherichia coli O91 str. RM7190	1	0	0	0	0
Fervidobacterium pennivorans	1	0	0	0	0
Formosa sp. L2A11	1	0	0	0	0
Frischella perrara	1	0	0	0	0
Fusobacterium gonidiaformans ATCC 25563	1	0	0	0	0
Gallibacterium anatis UMN179	1	0	0	0	0
Gammaproteobacteria bacterium ESL0073	1	0	0	0	0
Geobacter sulfurreducens	1	0	0	0	0
Georgenia sp. Z294	1	0	0	0	0
Gluconobacter albidus	1	0	0	0	0
Gordonia sp. JH63	1	0	0	0	0
Gordonibacter urolithinfaciens	1	0	0	0	0
Haemophilus influenzae PittEE	1	0	0	0	0
Hafnia alvei FB1	1	0	0	0	0
Haloarcula marismortui ATCC 43049	1	0	0	0	0
Halobacillus litoralis	1	0	0	0	0
Halobacillus mangrovi	1	0	0	0	0
Halomonas elongata DSM 2581	1	0	0	0	0
Halopiger xanaduensis SH-6	1	0	0	0	0
Haloplanus rallus	1	0	0	0	0
Helicobacter cholecystus	1	0	0	0	0
Helicobacter suis	1	0	0	0	0
Hepatitis B virus	1	0	0	0	0
Hoeflea sp. IMCC20628	1	0	0	0	0
Hyphomicrobium nitrativorans NL23	1	0	0	0	0
Ichthyobacterium seriolicida	1	0	0	0	0
Kingella kingae	1	0	0	0	0
Klebsiella pneumoniae CG43	1	0	0	0	0
Kribbella flavida DSM 17836	1	0	0	0	0
Kurthia zopfii	1	0	0	0	0
Lachnoclostridium sp. YL32	1	0	0	0	0
Lachnospiraceae bacterium KGMB03038	1	0	0	0	0
Lacinutrix venerupis	1	0	0	0	0
Lactiplantibacillus plantarum subsp. plantarum	1	0	0	0	0
Lactobacillus amylolyticus	1	0	0	0	0
Lactobacillus amylovorus DSM 20531	1	0	0	0	0
Lactobacillus delbrueckii	1	0	0	0	0
Lactobacillus gastricus	1	0	0	0	0
Lactobacillus jensenii JV-V16	1	0	0	0	0
Lactobacillus johnsonii	1	0	0	0	0
Lactobacillus ruminis ATCC 27782	1	0	0	0	0
Lactococcus lactis subsp. cremoris	1	0	0	0	0
Lactococcus piscium	1	0	0	0	0
Legionella clemsonensis	1	0	0	0	0
Legionella longbeachae	1	0	0	0	0
Legionella pneumophila subsp. pneumophila str. Philadelphia 1	1	0	0	0	0
Leptolyngbya sp. O-77	1	0	0	0	0
Leuconostoc citreum	1	0	0	0	0
Leuconostoc gelidum	1	0	0	0	0
Marinobacter sp. JH2	1	0	0	0	0
Mesorhizobium opportunistum WSM2075	1	0	0	0	0
Methylomonas koyamae	1	0	0	0	0
Micavibrio aeruginosavorus	1	0	0	0	0
Microbulbifer agarilyticus	1	0	0	0	0
Microbulbifer thermotolerans	1	0	0	0	0
Micromonospora aurantiaca	1	0	0	0	0
Micromonospora rifamycinica	1	0	0	0	0
Mocis latipes granulovirus	1	0	0	0	0
Mucilaginibacter paludis DSM 18603	1	0	0	0	0
Mycobacterium parmense	1	0	0	0	0
Mycolicibacterium chitae	1	0	0	0	0
Mycolicibacterium tokaiense	1	0	0	0	0
Mycolicibacterium vaccae 95051	1	0	0	0	0
Mycoplasma anseris	1	0	0	0	0
Mycoplasma anserisalpingitidis	1	0	0	0	0
Mycoplasma capricolum subsp. capricolum ATCC 27343	1	0	0	0	0
Mycoplasma crocodyli MP145	1	0	0	0	0
Mycoplasma flocculare ATCC 27399	1	0	0	0	0
Mycoplasma iowae	1	0	0	0	0
Mycoplasma penetrans HF-2	1	0	0	0	0
Mycoplasma phocidae	1	0	0	0	0
Mycoplasma pullorum	1	0	0	0	0
Mycoplasmopsis californica	1	0	0	0	0
Myxococcus hansupus	1	0	0	0	0
Nitrospira moscoviensis	1	0	0	0	0
Novosphingobium resinovorum	1	0	0	0	0
Paenibacillus baekrokdamisoli	1	0	0	0	0
Paenibacillus donghaensis	1	0	0	0	0
Paenibacillus mucilaginosus 3016	1	0	0	0	0
Paenibacillus sp. DCT19	1	0	0	0	0
Paenibacillus sp. HB172198	1	0	0	0	0
Paenibacillus stellifer	1	0	0	0	0
Pandoravirus dulcis	1	0	0	0	0
Pandoravirus inopinatum	1	0	0	0	0
Pandoravirus macleodensis	1	0	0	0	0
Pantoea stewartii	1	0	0	0	0
Paraburkholderia hospita	1	0	0	0	0
Paraburkholderia phenoliruptrix BR3459a	1	0	0	0	0
Paracoccus denitrificans PD1222	1	0	0	0	0
Parvibaculum lavamentivorans DS-1	1	0	0	0	0
Pasteurella dagmatis	1	0	0	0	0
Pediococcus claussenii	1	0	0	0	0
Peptoniphilus ivorii	1	0	0	0	0
Peribacillus simplex	1	0	0	0	0
Photobacterium damselae subsp. damselae	1	0	0	0	0
Polaribacter sp. ALD11	1	0	0	0	0
Pontibacter akesuensis	1	0	0	0	0
Proteus sp. CD3	1	0	0	0	0
Pseudanabaena sp. ABRG5-3	1	0	0	0	0
Pseudoalteromonas sp. Bsw20308	1	0	0	0	0
Pseudodesulfovibrio aespoeensis Aspo-2	1	0	0	0	0
Pseudodesulfovibrio profundus	1	0	0	0	0
Pseudomonas aeruginosa NCGM2.S1	1	0	0	0	0
Pseudomonas aeruginosa SJTD-1	1	0	0	0	0
Pseudomonas aeruginosa UCBPP-PA14	1	0	0	0	0
Pseudomonas alcaliphila JAB1	1	0	0	0	0
Pseudomonas frederiksbergensis	1	0	0	0	0
Pseudomonas mandelii	1	0	0	0	0
Pseudomonas mendocina NK-01	1	0	0	0	0
Pseudomonas mendocina S5.2	1	0	0	0	0
Pseudomonas reinekei	1	0	0	0	0
Pseudomonas saudiphocaensis	1	0	0	0	0
Pseudomonas sp. 7SR1	1	0	0	0	0
Pseudomonas sp. AK6U	1	0	0	0	0
Pseudomonas sp. CFSAN084952	1	0	0	0	0
Pseudomonas sp. FDAARGOS_380	1	0	0	0	0
Pseudomonas sp. Leaf58	1	0	0	0	0
Pseudomonas sp. LPH1	1	0	0	0	0
Pseudomonas sp. NIBRBAC000502773	1	0	0	0	0
Pseudomonas sp. PE08	1	0	0	0	0
Pseudomonas sp. R76	1	0	0	0	0
Pseudomonas sp. RU47	1	0	0	0	0
Pseudomonas sp. s211(2017)	1	0	0	0	0
Pseudomonas sp. St29	1	0	0	0	0
Pseudomonas sp. WCS374	1	0	0	0	0
Pseudomonas stutzeri DSM 4166	1	0	0	0	0
Pseudomonas syringae	1	0	0	0	0
Pseudomonas thivervalensis	1	0	0	0	0
Pseudomonas trivialis	1	0	0	0	0
Pseudomonas versuta	1	0	0	0	0
Pseudomonas xanthomarina	1	0	0	0	0
Pseudothermotoga hypogea DSM 11164 = NBRC 106472	1	0	0	0	0
Pseudovibrio sp. FO-BEG1	1	0	0	0	0
Pusillimonas sp. T7-7	1	0	0	0	0
Pyrococcus kukulkanii	1	0	0	0	0
Ralstonia solanacearum PSI07	1	0	0	0	0
Rathayibacter sp. VKM Ac-2760	1	0	0	0	0
Rhizobium leguminosarum	1	0	0	0	0
Rhizobium phaseoli	1	0	0	0	0
Rhodococcus sp. WAY2	1	0	0	0	0
Rhodopseudomonas palustris BisB18	1	0	0	0	0
Rhodospirillum rubrum	1	0	0	0	0
Rhodothermus marinus SG0.5JP17-172	1	0	0	0	0
Roseomonas mucosa	1	0	0	0	0
Ruminiclostridium cellulolyticum H10	1	0	0	0	0
Ruminococcus albus 7 = DSM 20455	1	0	0	0	0
Salinivibrio sp. YCSC6	1	0	0	0	0
Salmonella enterica subsp. enterica serovar Moscow str. S-1843	1	0	0	0	0
Salmonella sp. HNK130	1	0	0	0	0
Selenomonas sputigena ATCC 35185	1	0	0	0	0
Serinicoccus marinus DSM 15273	1	0	0	0	0
Shewanella sp. Arc9-LZ	1	0	0	0	0
Shewanella sp. M2	1	0	0	0	0
Solibacillus silvestris StLB046	1	0	0	0	0
Sphingobacterium hotanense	1	0	0	0	0
Sphingobium cloacae	1	0	0	0	0
Sphingobium sp. TKS	1	0	0	0	0
Sphingopyxis sp. PAMC25046	1	0	0	0	0
Spiroplasma floricola 23-6	1	0	0	0	0
Staphylococcus arlettae	1	0	0	0	0
Staphylococcus caprae	1	0	0	0	0
Staphylococcus kloosii	1	0	0	0	0
Staphylococcus simulans	1	0	0	0	0
Staphylothermus marinus F1	1	0	0	0	0
Streptococcus constellatus subsp. pharyngis C232	1	0	0	0	0
Streptococcus dysgalactiae	1	0	0	0	0
Streptococcus macedonicus ACA-DC 198	1	0	0	0	0
Streptococcus porcinus	1	0	0	0	0
Streptococcus sp. FDAARGOS_522	1	0	0	0	0
Streptococcus troglodytae	1	0	0	0	0
Streptomyces actuosus	1	0	0	0	0
Streptomyces kanamyceticus	1	0	0	0	0
Streptomyces leeuwenhoekii	1	0	0	0	0
Streptomyces lincolnensis	1	0	0	0	0
Streptomyces pristinaespiralis	1	0	0	0	0
Streptomyces sp. 604F	1	0	0	0	0
Streptomyces sp. CLI2509	1	0	0	0	0
Streptomyces sp. endophyte_N2	1	0	0	0	0
Streptomyces sp. GY16	1	0	0	0	0
Streptomyces sp. M56	1	0	0	0	0
Streptomyces sp. P3	1	0	0	0	0
Synechococcus phage ACG-2014d	1	0	0	0	0
Synechocystis sp. PCC 6714	1	0	0	0	0
Tetragenococcus osmophilus	1	0	0	0	0
Thermodesulfobacterium commune DSM 2178	1	0	0	0	0
Thermomicrobium roseum DSM 5159	1	0	0	0	0
Thioalkalivibrio sulfidiphilus HL-EbGr7	1	0	0	0	0
Thioclava nitratireducens	1	0	0	0	0
Thiomicrorhabdus sp. G1	1	0	0	0	0
Torque teno virus 10	1	0	0	0	0
Torque teno virus 12	1	0	0	0	0
Torque teno virus 23	1	0	0	0	0
Torque teno virus 24	1	0	0	0	0
Trichodesmium erythraeum IMS101	1	0	0	0	0
Vampirococcus sp. LiM	1	0	0	0	0
Variovorax paradoxus S110	1	0	0	0	0
Vibrio fluvialis	1	0	0	0	0
Vibrio vulnificus MO6-24/O	1	0	0	0	0
Virgibacillus necropolis	1	0	0	0	0
Weissella jogaejeotgali	1	0	0	0	0
Wolbachia pipientis	1	0	0	0	0
Xanthomonas sacchari	1	0	0	0	0
Mitsuaria sp. 7	0	7436	1	0	0
Roseateles depolymerans	0	2774	0	0	0
Verminephrobacter eiseniae EF01-2	0	1619	1	0	0
Melaminivora sp. SC2-9	0	1301	0	0	0
Paucibacter sp. KCTC 42545	0	177	11	0	0
Thiomonas sp. X19	0	148	3	2	0
Ralstonia pickettii 12D	0	124	0	0	0
Paraburkholderia sp. 7MH5	0	64	0	2	0
Inhella inkyongensis	0	40	1	0	0
Sphaerotilus natans subsp. sulfidivorans	0	32	0	0	2
Rhizobacter gummiphilus	0	18	1	0	1
Limnohabitans sp. 103DPR2	0	18	1	0	0
Candidatus Kinetoplastibacterium sorsogonicusi	0	18	0	0	0
Lautropia mirabilis	0	12	2	0	2
Chlamydia pneumoniae	0	11	0	0	7
Spirosoma pollinicola	0	11	9	0	4
Cupriavidus gilardii CR3	0	11	0	0	0
Mobiluncus curtisii ATCC 43063	0	9	0	1	0
Janibacter melonis	0	8	5	2	1
Brevundimonas sp. Bb-A	0	7	0	3	2
Ralstonia solanacearum	0	7	0	1	0
Aquabacterium olei	0	7	1	0	6
Acinetobacter sp. dk386	0	7	13	0	1
Oligella urethralis	0	7	2	0	0
Arcobacter cryaerophilus ATCC 43158	0	7	0	0	0
Schaalia odontolytica	0	6	1	89	0
Paludibacter propionicigenes WB4	0	6	0	28	0
Hymenobacter sp. PAMC 26554	0	6	0	3	7
Corynebacterium efficiens YS-314	0	6	0	1	0
Taylorella equigenitalis	0	6	0	0	2
Simplicispira suum	0	6	1	0	0
Ephemeroptericola cinctiostellae	0	6	0	0	0
Paraburkholderia sp. SOS3	0	6	0	0	0
Agrobacterium tumefaciens	0	5	0	1	11
Micrococcus luteus	0	5	9	1	7
Massilia armeniaca	0	5	1	1	0
Candidatus Symbiobacter mobilis CR	0	5	0	0	1
Ramlibacter tataouinensis	0	5	1	0	0
Arcobacter cryaerophilus	0	5	0	0	0
Desulfotalea psychrophila LSv54	0	5	0	0	0
Kocuria flava	0	5	0	0	0
Pseudomonas yamanorum	0	4	1	1	4
Bacillus sp. NSP9.1	0	4	0	0	3
Gloeocapsa sp. PCC 7428	0	4	4	0	2
Comamonas serinivorans	0	4	2	0	0
Burkholderia sp. DHOD12	0	4	1	0	0
Ottowia sp. oral taxon 894	0	4	1	0	0
Flavobacterium haoranii	0	4	0	0	0
Ictalurid herpesvirus 2	0	4	0	0	0
Micromonospora purpureochromogenes	0	4	0	0	0
Nostoc linckia NIES-25	0	4	0	0	0
Sphingomonas sp. Cra20	0	4	0	0	0
Xanthomonas albilineans	0	4	0	0	0
Alloprevotella sp. E39	0	3	1	59	0
Bacteroides caccae	0	3	0	9	0
Geodermatophilus obscurus DSM 43160	0	3	0	2	3
Pedobacter sp. G11	0	3	7	2	2
Sphaerospermopsis kisseleviana NIES-73	0	3	0	1	1
Brachybacterium faecium DSM 4810	0	3	0	1	0
Faecalitalea cylindroides T2-87	0	3	0	1	0
Modestobacter marinus	0	3	2	0	60
Agrococcus carbonis	0	3	1	0	4
Anaeromyxobacter sp. Fw109-5	0	3	1	0	1
Fermentimonas caenicola	0	3	0	0	1
Geobacter sp. FeAm09	0	3	0	0	1
Pelistega sp. NLN63	0	3	1	0	0
Sphingomonas sp. LM7	0	3	1	0	0
Comamonas terrigena NBRC 13299	0	3	0	0	0
Desulfobacula toluolica Tol2	0	3	0	0	0
Hydrogenophaga sp. BPS33	0	3	0	0	0
Hydrogenophaga sp. PBC	0	3	0	0	0
Oryzomicrobium terrae	0	3	0	0	0
Oscillatoriales cyanobacterium JSC-12	0	3	0	0	0
Pandoraea pnomenusa	0	3	0	0	0
Polaromonas sp. JS666	0	3	0	0	0
Polynucleobacter necessarius	0	3	0	0	0
Streptomyces coeruleorubidus	0	3	0	0	0
Xylophilus sp. KACC 21265	0	3	0	0	0
Singulisphaera acidiphila DSM 18658	0	2	2	29	0
Lachnoanaerobaculum umeaense	0	2	1	11	0
Kocuria palustris	0	2	1	7	4
Corynebacterium flavescens	0	2	4	3	4
Clostridium perfringens	0	2	1	2	6
Kocuria turfanensis	0	2	3	2	3
Variovorax sp. PAMC 28711	0	2	2	2	1
Chamaesiphon minutus PCC 6605	0	2	1	2	1
Empedobacter brevis	0	2	1	2	1
Borreliella burgdorferi 29805	0	2	0	2	1
Raineyella sp. CBA3103	0	2	0	2	1
Pandoraea faecigallinarum	0	2	0	2	0
Oceanihabitans sp. IOP_32	0	2	0	1	5
Herbaspirillum huttiense	0	2	2	1	1
Paraburkholderia rhizoxinica HKI 454	0	2	1	1	1
Epidermidibacterium keratini	0	2	1	1	0
Ramlibacter tataouinensis TTB310	0	2	1	1	0
Burkholderia pyrrocinia	0	2	0	1	0
Clostridium saccharoperbutylacetonicum	0	2	0	1	0
Halanaerobium praevalens DSM 2228	0	2	0	1	0
Paenibacillus larvae	0	2	0	1	0
Streptomyces alboflavus	0	2	0	1	0
Streptomyces hygroscopicus	0	2	0	1	0
Streptomyces sp. WAC 01529	0	2	0	1	0
Pseudomonas sp. S34	0	2	11	0	17
Geitlerinema sp. PCC 7407	0	2	7	0	2
Microbacterium hominis	0	2	2	0	2
Corynebacterium ureicelerivorans	0	2	1	0	2
Staphylococcus cohnii	0	2	0	0	2
Acinetobacter sp. TTH0-4	0	2	12	0	1
Lysobacter capsici	0	2	2	0	1
Delftia tsuruhatensis	0	2	1	0	1
Burkholderia contaminans	0	2	0	0	1
Herbaspirillum robiniae	0	2	0	0	1
Methylobacterium sp. 17Sr1-1	0	2	0	0	1
Noviherbaspirillum sp. UKPF54	0	2	0	0	1
Paracoccus denitrificans	0	2	0	0	1
Rheinheimera sp. LHK132	0	2	0	0	1
Luteimonas sp. JM171	0	2	3	0	0
Cytophaga hutchinsonii ATCC 33406	0	2	2	0	0
Iamiaceae bacterium SCSIO 58843	0	2	2	0	0
Hartmannibacter diazotrophicus	0	2	1	0	0
Methylibium sp. Pch-M	0	2	1	0	0
Planctomycetes bacterium Mal33	0	2	1	0	0
Azoarcus sp. CIB	0	2	0	0	0
Bartonella henselae	0	2	0	0	0
Bifidobacterium adolescentis	0	2	0	0	0
Bordetella pertussis	0	2	0	0	0
Candidatus Syntrophocurvum alkaliphilum	0	2	0	0	0
Cellulophaga lytica	0	2	0	0	0
Chryseobacterium balustinum	0	2	0	0	0
Chryseobacterium joostei	0	2	0	0	0
Clostridium cochlearium	0	2	0	0	0
Comamonas sp. NLF-7-7	0	2	0	0	0
Crateriforma conspicua	0	2	0	0	0
Dechloromonas sp. HYN0024	0	2	0	0	0
Deinococcus maricopensis DSM 21211	0	2	0	0	0
Ferriphaselus amnicola	0	2	0	0	0
Finegoldia magna ATCC 53516	0	2	0	0	0
Lactobacillus nenjiangensis	0	2	0	0	0
Macrococcus sp. IME1552	0	2	0	0	0
Methanocaldococcus vulcanius M7	0	2	0	0	0
Methylibium petroleiphilum PM1	0	2	0	0	0
Mycobacterium sp. JS623	0	2	0	0	0
Neisseriaceae bacterium DSM 100970	0	2	0	0	0
Ornithobacterium rhinotracheale	0	2	0	0	0
Pseudoalteromonas luteoviolacea	0	2	0	0	0
Rickettsia canadensis	0	2	0	0	0
Staphylococcus capitis subsp. capitis	0	2	0	0	0
Streptococcus thermophilus	0	2	0	0	0
Streptomyces sp. SYP-A7193	0	2	0	0	0
Tatlockia micdadei	0	2	0	0	0
Tessaracoccus timonensis	0	2	0	0	0
Neisseria meningitidis	0	1	0	34	0
Phocaeicola salanitronis DSM 18170	0	1	0	29	0
Jeotgalicoccus saudimassiliensis	0	1	4	6	1
Butyricimonas faecalis	0	1	3	5	2
Gemella morbillorum	0	1	1	5	1
Sphingobacterium sp. DR205	0	1	2	5	0
Bacteroides heparinolyticus	0	1	0	5	0
Nesterenkonia sp. NBAIMH1	0	1	0	5	0
Nocardiopsis dassonvillei	0	1	5	4	2
Treponema pedis str. T A4	0	1	0	4	0
Auraticoccus monumenti	0	1	0	3	1
Streptomyces parvulus	0	1	5	3	0
Cutibacterium granulosum	0	1	5	2	38
Corynebacterium camporealensis	0	1	1	2	2
Corynebacterium doosanense CAU 212 = DSM 45436	0	1	1	2	2
Enterococcus thailandicus	0	1	0	2	1
Leptotrichia trevisanii	0	1	4	2	0
Beijerinckiaceae bacterium RH AL1	0	1	2	2	0
Candidatus Saccharibacteria bacterium YM_S32_TM7_50_20	0	1	1	2	0
Peribacillus butanolivorans	0	1	0	2	0
Pseudomonas viridiflava	0	1	26	1	2
Methylobacterium brachiatum	0	1	2	1	1
Opitutus terrae PB90-1	0	1	2	1	1
Anaerocolumna sp. CBA3638	0	1	0	1	1
Hymenobacter sp. BRD72	0	1	0	1	1
Massilia sp. WG5	0	1	0	1	1
Raphidiopsis curvata NIES-932	0	1	0	1	1
Streptomyces sp. W1SF4	0	1	0	1	1
Streptomyces vietnamensis	0	1	0	1	1
Veillonella dispar	0	1	0	1	1
Roseimicrobium sp. ORNL1	0	1	3	1	0
Labrys neptuniae	0	1	2	1	0
Lysobacter enzymogenes	0	1	2	1	0
Pantoea dispersa	0	1	1	1	0
Pseudomonas syringae CC1557	0	1	1	1	0
Staphylococcus pettenkoferi	0	1	1	1	0
Streptomyces bingchenggensis BCW-1	0	1	1	1	0
Acidovorax avenae subsp. avenae	0	1	0	1	0
Actinoalloteichus hoggarensis	0	1	0	1	0
Amycolatopsis sp. YIM 10	0	1	0	1	0
Bacillus dafuensis	0	1	0	1	0
Bacillus subtilis group	0	1	0	1	0
Brachyspira hyodysenteriae	0	1	0	1	0
Cupriavidus basilensis	0	1	0	1	0
Dermatophilus congolensis	0	1	0	1	0
Halorubrum lacusprofundi ATCC 49239	0	1	0	1	0
Nocardioides sp. SB3-45	0	1	0	1	0
Planctomycetes bacterium ElP	0	1	0	1	0
Polaribacter sp. Hel1_33_78	0	1	0	1	0
Staphylococcus pasteuri	0	1	0	1	0
Staphylococcus sciuri	0	1	0	1	0
Streptococcus uberis	0	1	0	1	0
Streptomyces fungicidicus	0	1	0	1	0
Streptomyces sp. Z022	0	1	0	1	0
Variovorax paradoxus	0	1	0	1	0
Rhodobacter capsulatus SB 1003	0	1	3	0	11
Georgenia sp. Z443	0	1	0	0	11
Corynebacterium simulans	0	1	1	0	7
Tessaracoccus sp. T2.5-30	0	1	1	0	4
Hymenobacter sp. 17J36-26	0	1	2	0	3
Deinococcus sp. NW-56	0	1	1	0	3
Chondrocystis sp. NIES-4102	0	1	0	0	3
Mycobacterium dioxanotrophicus	0	1	0	0	3
Sphingomonas sp. C33	0	1	5	0	2
Nocardioides seonyuensis	0	1	1	0	2
Planctomyces sp. SH-PL14	0	1	1	0	2
Streptomonospora sp. M2	0	1	1	0	2
Acholeplasma brassicae	0	1	0	0	2
Brevibacterium aurantiacum	0	1	0	0	2
Elizabethkingia sp. JS20170427COW	0	1	0	0	2
Massilia putida	0	1	0	0	2
Methylobacterium sp. DM1	0	1	0	0	2
Nocardioides sp. S-1144	0	1	0	0	2
Tannerella sp. oral taxon HOT-286	0	1	0	0	2
Acinetobacter pittii	0	1	47	0	1
Serratia rubidaea	0	1	6	0	1
Sphaerobacter thermophilus DSM 20745	0	1	6	0	1
Pseudoxanthomonas suwonensis	0	1	4	0	1
Paraburkholderia sp. 7Q-K02	0	1	2	0	1
Bacillus sp. FJAT-42376	0	1	1	0	1
Capnocytophaga canimorsus	0	1	1	0	1
Exiguobacterium mexicanum	0	1	1	0	1
Indioceanicola profundi	0	1	1	0	1
Actinoplanes sp. N902-109	0	1	0	0	1
Bacillus freudenreichii	0	1	0	0	1
Blattabacterium cuenoti	0	1	0	0	1
Brochothrix thermosphacta	0	1	0	0	1
Cellvibrio sp. PSBB006	0	1	0	0	1
Chelativorans sp. BNC1	0	1	0	0	1
Deinococcus ficus	0	1	0	0	1
Deinococcus wulumuqiensis	0	1	0	0	1
Ensifer adhaerens	0	1	0	0	1
Enterobacter asburiae	0	1	0	0	1
Exiguobacterium sp. AT1b	0	1	0	0	1
Finegoldia magna	0	1	0	0	1
Flavobacterium johnsoniae	0	1	0	0	1
Hydrogenophaga pseudoflava	0	1	0	0	1
Legionella oakridgensis ATCC 33761 = DSM 21215	0	1	0	0	1
Legionella sainthelensi	0	1	0	0	1
Leuconostoc mesenteroides	0	1	0	0	1
Lysobacter gummosus	0	1	0	0	1
Methanoculleus sp. MAB1	0	1	0	0	1
Oceanisphaera profunda	0	1	0	0	1
Oscillatoria acuminata PCC 6304	0	1	0	0	1
Oxalobacter formigenes	0	1	0	0	1
Pantoea sp. 201603H	0	1	0	0	1
Rathayibacter tanaceti	0	1	0	0	1
Sphingobacteriaceae bacterium GW460-11-11-14-LB5	0	1	0	0	1
Sulfuriferula sp. AH1	0	1	0	0	1
Flavihumibacter sp. SB-02	0	1	21	0	0
Acinetobacter larvae	0	1	14	0	0
Acinetobacter soli	0	1	9	0	0
Candidatus Pantoea carbekii	0	1	7	0	0
Acinetobacter sp. C16S1	0	1	6	0	0
Brucella abortus	0	1	4	0	0
Lysobacter antibioticus	0	1	4	0	0
Altererythrobacter sp. NS1	0	1	3	0	0
Stigmatella aurantiaca DW4/3-1	0	1	3	0	0
Sulfitobacter pseudonitzschiae	0	1	3	0	0
Bacillus paralicheniformis	0	1	2	0	0
Corallococcus coralloides	0	1	2	0	0
Francisella philomiragia	0	1	2	0	0
Nocardioides sp. R-3366	0	1	2	0	0
Rhodoferax koreense	0	1	2	0	0
Streptomyces tirandamycinicus	0	1	2	0	0
Wolbachia endosymbiont of Drosophila simulans wHa	0	1	2	0	0
Acinetobacter gyllenbergii	0	1	1	0	0
Acinetobacter sp. TGL-Y2	0	1	1	0	0
Alloactinosynnema sp. L-07	0	1	1	0	0
Calditerrivibrio nitroreducens DSM 19672	0	1	1	0	0
Campylobacter jejuni subsp. jejuni 414	0	1	1	0	0
Carnobacterium sp. PL17RED31	0	1	1	0	0
Clavibacter michiganensis	0	1	1	0	0
Corallococcus macrosporus	0	1	1	0	0
Euzebya sp. DY32-46	0	1	1	0	0
Francisella halioticida	0	1	1	0	0
Marinomonas primoryensis	0	1	1	0	0
Micromonospora echinaurantiaca	0	1	1	0	0
Paenibacillus sp. B01	0	1	1	0	0
Pedobacter sp. CJ43	0	1	1	0	0
Pseudolabrys sp. FHR47	0	1	1	0	0
Rhodococcus opacus B4	0	1	1	0	0
Sphingobium sp. CAP-1	0	1	1	0	0
Sphingomonas sp. FARSPH	0	1	1	0	0
Stenotrophomonas acidaminiphila	0	1	1	0	0
Streptomyces luteoverticillatus	0	1	1	0	0
Vibrio panuliri	0	1	1	0	0
Achromobacter xylosoxidans A8	0	1	0	0	0
Acidipropionibacterium jensenii	0	1	0	0	0
Acidothermus cellulolyticus 11B	0	1	0	0	0
Acidovorax citrulli	0	1	0	0	0
Acinetobacter guillouiae	0	1	0	0	0
Advenella kashmirensis WT001	0	1	0	0	0
Aeromonas media	0	1	0	0	0
Allochromatium vinosum DSM 180	0	1	0	0	0
Allokutzneria albata	0	1	0	0	0
Allopseudarcicella aquatilis	0	1	0	0	0
Aminipila sp. JN-18	0	1	0	0	0
Anaerobutyricum hallii	0	1	0	0	0
Anaerostipes hadrus	0	1	0	0	0
Aquareovirus C	0	1	0	0	0
Aquimarina sp. AD10	0	1	0	0	0
Arcobacter anaerophilus	0	1	0	0	0
Armatimonadetes bacterium Uphvl-Ar1	0	1	0	0	0
Arthrobacter sp. FB24	0	1	0	0	0
Astrovirus MLB2	0	1	0	0	0
Bacillus cereus Rock3-29	0	1	0	0	0
Bacillus cereus Rock3-44	0	1	0	0	0
Bacillus filamentosus	0	1	0	0	0
Bacillus mycoides	0	1	0	0	0
Bacillus sp. ABP14	0	1	0	0	0
Bacillus sp. N3536	0	1	0	0	0
Bacillus thermoamylovorans	0	1	0	0	0
Bacteroidales bacterium CF	0	1	0	0	0
Bathymodiolus thermophilus thioautotrophic gill symbiont	0	1	0	0	0
BeAn 58058 virus	0	1	0	0	0
Bergeyella cardium	0	1	0	0	0
Bordetella flabilis	0	1	0	0	0
Borrelia anserina	0	1	0	0	0
Borrelia duttonii Ly	0	1	0	0	0
Bosea sp. F3-2	0	1	0	0	0
Brachyspira pilosicoli B2904	0	1	0	0	0
Bradyrhizobium lablabi	0	1	0	0	0
Brevibacterium linens	0	1	0	0	0
Buchnera aphidicola (Cinara cuneomaculata)	0	1	0	0	0
Buchnera aphidicola (Hyperomyzus lactucae)	0	1	0	0	0
Buchnera aphidicola (Lipaphis pseudobrassicae)	0	1	0	0	0
Burkholderia diffusa	0	1	0	0	0
Burkholderia glumae	0	1	0	0	0
Burkholderia pseudomallei 576	0	1	0	0	0
Burkholderia pseudomallei MSHR1153	0	1	0	0	0
Burkholderia pseudomallei MSHR305	0	1	0	0	0
Burkholderia sp. LA-2-3-30-S1-D2	0	1	0	0	0
Butyrivibrio proteoclasticus B316	0	1	0	0	0
Caballeronia sp. SBC2	0	1	0	0	0
Candidatus Babela massiliensis	0	1	0	0	0
Candidatus Gullanella endobia	0	1	0	0	0
Candidatus Kinetoplastibacterium crithidii	0	1	0	0	0
Candidatus Kuenenia stuttgartiensis	0	1	0	0	0
Candidatus Nasuia deltocephalinicola	0	1	0	0	0
Carnobacterium divergens	0	1	0	0	0
Caulobacter flavus	0	1	0	0	0
Caulobacter sp. Ji-3-8	0	1	0	0	0
Celeribacter indicus	0	1	0	0	0
Cellulophaga baltica 18	0	1	0	0	0
Cellvibrio sp. KY-YJ-3	0	1	0	0	0
Chlamydia pecorum	0	1	0	0	0
Chlamydia trachomatis	0	1	0	0	0
Chromobacterium violaceum	0	1	0	0	0
Chryseobacterium carnipullorum	0	1	0	0	0
Chryseobacterium sp. SNU WT5	0	1	0	0	0
Chrysochromulina ericina virus	0	1	0	0	0
Citrobacter rodentium ICC168	0	1	0	0	0
Citromicrobium sp. JL477	0	1	0	0	0
Clostridium botulinum B str. Eklund 17B (NRP)	0	1	0	0	0
Clostridium isatidis	0	1	0	0	0
Clostridium sp. CT4	0	1	0	0	0
Clostridium taeniosporum	0	1	0	0	0
Crocosphaera subtropica ATCC 51142	0	1	0	0	0
Cuniculiplasma divulgatum	0	1	0	0	0
Cupriavidus malaysiensis	0	1	0	0	0
Cupriavidus metallidurans	0	1	0	0	0
Cyanothece sp. PCC 7425	0	1	0	0	0
Desulfosporosinus acidiphilus SJ4	0	1	0	0	0
Dickeya dadantii subsp. dieffenbachiae NCPPB 2976	0	1	0	0	0
Dinoroseobacter shibae DFL 12 = DSM 16493	0	1	0	0	0
Draconibacterium orientale	0	1	0	0	0
Dyadobacter sp. 32	0	1	0	0	0
Edwardsiella hoshinae	0	1	0	0	0
Enterobacter roggenkampii	0	1	0	0	0
Enterobacter sp. SA187	0	1	0	0	0
Enterococcus gilvus	0	1	0	0	0
Fibrobacter succinogenes subsp. succinogenes S85	0	1	0	0	0
Finegoldia magna ATCC 29328	0	1	0	0	0
Flavobacterium anhuiense	0	1	0	0	0
Flavobacterium branchiophilum FL-15	0	1	0	0	0
Flavobacterium sp. KBS0721	0	1	0	0	0
Formosa sp. Hel1_33_131	0	1	0	0	0
Formosa sp. Hel3_A1_48	0	1	0	0	0
Fusobacterium hwasookii	0	1	0	0	0
Fusobacterium periodonticum	0	1	0	0	0
Gordonia iterans	0	1	0	0	0
Gottschalkia acidurici 9a	0	1	0	0	0
Gracilibacillus sp. SCU50	0	1	0	0	0
Gramella fulva	0	1	0	0	0
Haemophilus pittmaniae	0	1	0	0	0
Halomicronema hongdechloris C2206	0	1	0	0	0
Halomonas chromatireducens	0	1	0	0	0
Halomonas socia	0	1	0	0	0
Hydrogenophaga sp. PBL-H3	0	1	0	0	0
Hydrogenophaga sp. RAC07	0	1	0	0	0
Kineococcus radiotolerans SRS30216 = ATCC BAA-149	0	1	0	0	0
Komagataeibacter nataicola	0	1	0	0	0
Lachnospiraceae bacterium GAM79	0	1	0	0	0
Lactobacillus brevis	0	1	0	0	0
Lactobacillus fuchuensis	0	1	0	0	0
Lactobacillus murinus	0	1	0	0	0
Lactobacillus parabuchneri	0	1	0	0	0
Lactobacillus terrae	0	1	0	0	0
Laribacter hongkongensis	0	1	0	0	0
Legionella cherrii	0	1	0	0	0
Leptotrichia hongkongensis	0	1	0	0	0
Leptotrichia sp. oral taxon 212	0	1	0	0	0
Luteibacter rhizovicinus DSM 16549	0	1	0	0	0
Luteimonas chenhongjianii	0	1	0	0	0
Marisediminicola antarctica	0	1	0	0	0
Massilia flava	0	1	0	0	0
Massilia lutea	0	1	0	0	0
Massilia plicata	0	1	0	0	0
Mesorhizobium amorphae CCNWGS0123	0	1	0	0	0
Metabacillus litoralis	0	1	0	0	0
Methanobrevibacter millerae	0	1	0	0	0
Methanococcus vannielii SB	0	1	0	0	0
Methanosarcina barkeri 3	0	1	0	0	0
Methanosarcina siciliae	0	1	0	0	0
Methanosphaera stadtmanae	0	1	0	0	0
Methylomonas sp. DH-1	0	1	0	0	0
Methylorubrum extorquens AM1	0	1	0	0	0
Methylosinus sp. C49	0	1	0	0	0
Microbacterium sp. ABRD_28	0	1	0	0	0
Micromonospora chokoriensis	0	1	0	0	0
Microvirga sp. 17 mud 1-3	0	1	0	0	0
Mucinivorans hirudinis	0	1	0	0	0
Mycobacterium canettii CIPT 140070017	0	1	0	0	0
Mycobacterium sp. EPa45	0	1	0	0	0
Mycobacterium sp. YC-RL4	0	1	0	0	0
Mycolicibacterium phlei	0	1	0	0	0
Mycoplasma hyopneumoniae	0	1	0	0	0
Myroides odoratus DSM 2801	0	1	0	0	0
Myroides sp. CJ210	0	1	0	0	0
Neodiprion abietis NPV	0	1	0	0	0
Neorhizobium sp. NCHU2750	0	1	0	0	0
Nitratireductor sp. SY7	0	1	0	0	0
Nitrosopumilus piranensis	0	1	0	0	0
Nitrosospira multiformis ATCC 25196	0	1	0	0	0
Nocardia brasiliensis	0	1	0	0	0
Nocardioides euryhalodurans	0	1	0	0	0
Nocardiopsis alba ATCC BAA-2165	0	1	0	0	0
Nordella sp. HKS 07	0	1	0	0	0
'Nostoc azollae' 0708	0	1	0	0	0
Nostoc sphaeroides	0	1	0	0	0
Oceanobacillus sp. 160	0	1	0	0	0
Olleya sp. Bg11-27	0	1	0	0	0
Ornithinimicrobium sp. HY006	0	1	0	0	0
Oscillibacter valericigenes Sjm18-20	0	1	0	0	0
Paenibacillus polymyxa E681	0	1	0	0	0
Paenibacillus sp. FSL H7-0357	0	1	0	0	0
Pandoraea norimbergensis	0	1	0	0	0
Paraburkholderia caribensis MBA4	0	1	0	0	0
Paraburkholderia sp. CCGE1002	0	1	0	0	0
Paraburkholderia sp. DHF22	0	1	0	0	0
Pedobacter sp. KBS0701	0	1	0	0	0
Persicobacter sp. JZB09	0	1	0	0	0
Planctomycetes bacterium Mal48	0	1	0	0	0
Planococcus donghaensis	0	1	0	0	0
Polaribacter sp. KT25b	0	1	0	0	0
Polaribacter sp. SA4-10	0	1	0	0	0
Polymorphum gilvum SL003B-26A1	0	1	0	0	0
Pradoshia sp. D12	0	1	0	0	0
Proteiniphilum saccharofermentans	0	1	0	0	0
Proteus sp. ZN5	0	1	0	0	0
Providencia alcalifaciens	0	1	0	0	0
Pseudoalteromonas carrageenovora	0	1	0	0	0
Pseudoalteromonas nigrifaciens	0	1	0	0	0
Pseudobutyrivibrio xylanivorans	0	1	0	0	0
Pseudomonas putida F1	0	1	0	0	0
Pseudonocardia sp. HH130629-09	0	1	0	0	0
Pseudonocardia sp. HH130630-07	0	1	0	0	0
Psychrobacter sp. DAB_AL43B	0	1	0	0	0
Pulveribacter suum	0	1	0	0	0
Pusillimonas sp. ye3	0	1	0	0	0
Ralstonia insidiosa	0	1	0	0	0
Rhizobium sp. IRBG74	0	1	0	0	0
Rhodococcus coprophilus	0	1	0	0	0
Rhodoferax ferrireducens T118	0	1	0	0	0
Rhodoferax sp. Gr-4	0	1	0	0	0
Rhodothermaceae bacterium RA	0	1	0	0	0
Saccharothrix espanaensis DSM 44229	0	1	0	0	0
Salinarchaeum sp. Harcht-Bsk1	0	1	0	0	0
Salmonella enterica subsp. enterica serovar Inverness str. ATCC 10720	0	1	0	0	0
Serpentinomonas raichei	0	1	0	0	0
Shewanella loihica PV-4	0	1	0	0	0
Snyder-Theilen feline sarcoma virus	0	1	0	0	0
Sphingobacterium sp. G1-14	0	1	0	0	0
Sphingobium sp. YG1	0	1	0	0	0
Sphingopyxis sp. FD7	0	1	0	0	0
Spiribacter salinus M19-40	0	1	0	0	0
Spirochaeta perfilievii	0	1	0	0	0
Spiroplasma kunkelii CR2-3x	0	1	0	0	0
Spirosoma radiotolerans	0	1	0	0	0
Spirosoma rigui	0	1	0	0	0
Sporosarcina sp. PTS2304	0	1	0	0	0
Staphylococcus auricularis	0	1	0	0	0
Staphylococcus piscifermentans	0	1	0	0	0
Streptobacillus moniliformis	0	1	0	0	0
Streptococcus gallolyticus subsp. gallolyticus	0	1	0	0	0
Streptococcus pluranimalium	0	1	0	0	0
Streptococcus pneumoniae	0	1	0	0	0
Streptococcus salivarius	0	1	0	0	0
Streptococcus urinalis	0	1	0	0	0
Streptomyces asterosporus	0	1	0	0	0
Streptomyces bacillaris	0	1	0	0	0
Streptomyces clavuligerus	0	1	0	0	0
Streptomyces cyaneochromogenes	0	1	0	0	0
Streptomyces glaucescens	0	1	0	0	0
Streptomyces griseoviridis	0	1	0	0	0
Streptomyces griseus subsp. griseus NBRC 13350	0	1	0	0	0
Streptomyces paludis	0	1	0	0	0
Streptomyces sp. GS7	0	1	0	0	0
Sulfitobacter sp. AM1-D1	0	1	0	0	0
Sulfurimonas sp. GYSZ_1	0	1	0	0	0
Sulfurospirillum multivorans	0	1	0	0	0
Synechococcus sp. PCC 7502	0	1	0	0	0
Syntrophomonas wolfei subsp. wolfei str. Goettingen G311	0	1	0	0	0
Tenacibaculum maritimum NCIMB 2154	0	1	0	0	0
Tetragenococcus halophilus	0	1	0	0	0
Thauera humireducens	0	1	0	0	0
Thermanaerovibrio acidaminovorans DSM 6589	0	1	0	0	0
Thermoanaerobacterium aotearoense	0	1	0	0	0
Thermococcus pacificus	0	1	0	0	0
Thermofilum pendens Hrk 5	0	1	0	0	0
Tsukamurella paurometabola DSM 20162	0	1	0	0	0
Turicibacter sp. H121	0	1	0	0	0
Variovorax paradoxus EPS	0	1	0	0	0
Variovorax sp. RA8	0	1	0	0	0
Vibrio sp. THAF190c	0	1	0	0	0
Virgibacillus phasianinus	0	1	0	0	0
Xanthomonas arboricola	0	1	0	0	0
Yersinia sp. KBS0713	0	1	0	0	0
Prevotella sp. oral taxon 299 str. F0039	0	0	1	4726	0
Neisseria subflava	0	0	0	800	0
Prevotella ruminicola 23	0	0	0	403	0
Neisseria elongata	0	0	0	327	0
Campylobacter showae	0	0	0	272	0
Prevotella denticola F0289	0	0	0	192	0
Prevotella fusca JCM 17724	0	0	0	191	0
Prevotella scopos JCM 17725	0	0	0	175	0
Prevotella denticola	0	0	0	131	0
Prevotella dentalis DSM 3688	0	0	0	96	0
Campylobacter concisus	0	0	0	72	1
Porphyromonas asaccharolytica DSM 20707	0	0	0	68	0
Porphyromonas gingivalis	0	0	0	68	0
Pontibacter sp. SGAir0037	0	0	0	67	0
Atopobium parvulum DSM 20469	0	0	1	66	0
Veillonella parvula	0	0	1	62	0
Prevotella intermedia	0	0	1	56	1
Clostridium sp. SY8519	0	0	0	54	0
Capnocytophaga leadbetteri	0	0	0	46	0
Paraprevotella xylaniphila YIT 11841	0	0	0	38	0
Capnocytophaga sp. FDAARGOS_737	0	0	0	32	0
Mogibacterium diversum	0	0	1	29	0
Prevotella jejuni	0	0	0	25	0
Porphyromonas cangingivalis	0	0	1	24	0
Alienimonas californiensis	0	0	0	24	0
Bacteroides zoogleoformans	0	0	0	24	0
Flexistipes sinusarabici DSM 4947	0	0	0	24	0
Capnocytophaga gingivalis	0	0	0	22	2
Olsenella uli DSM 7084	0	0	0	21	0
Muribaculum sp. TLL-A4	0	0	0	20	0
Phocaeicola vulgatus	0	0	0	18	1
Neisseria mucosa	0	0	0	17	0
Neisseria lactamica	0	0	0	15	0
Lachnospiraceae bacterium oral taxon 500	0	0	0	14	0
Odoribacter splanchnicus	0	0	0	13	0
Porphyromonas crevioricanis	0	0	0	13	0
Campylobacter curvus	0	0	0	10	0
Veillonella parvula HSIVP1	0	0	0	10	0
Anaerococcus mediterraneensis	0	0	0	9	1
Capnocytophaga sputigena	0	0	1	8	2
Aquisphaera giovannonii	0	0	0	8	0
Moraxella cuniculi	0	0	0	8	0
Neisseria cinerea	0	0	0	7	1
Schaalia meyeri	0	0	0	7	1
Anaerotignum propionicum DSM 1682	0	0	0	7	0
Caloramator sp. E03	0	0	0	7	0
Mogibacterium pumilum	0	0	0	7	0
Neisseria elongata subsp. glycolytica	0	0	0	7	0
Neisseria meningitidis alpha14	0	0	0	7	0
Neisseria sp. oral taxon 014 str. F0314	0	0	0	7	0
Prevotella enoeca	0	0	0	7	0
Fusobacterium nucleatum	0	0	0	6	1
Leadbetterella byssophila DSM 17132	0	0	0	6	0
Petrimonas mucosa	0	0	0	6	0
Streptococcus cristatus	0	0	0	6	0
Veillonella rodentium	0	0	0	6	0
Corynebacterium jeikeium	0	0	0	5	1
Niabella soli DSM 19437	0	0	4	5	0
Streptomyces vinaceus	0	0	1	5	0
[Eubacterium] eligens ATCC 27750	0	0	0	5	0
Neisseria brasiliensis	0	0	0	5	0
Pseudopedobacter saltans DSM 12145	0	0	0	5	0
Spiroplasma apis B31	0	0	0	5	0
Corynebacterium casei LMG S-19264	0	0	1	4	0
Campylobacter gracilis	0	0	0	4	0
Campylobacter hominis ATCC BAA-381	0	0	0	4	0
Citrobacter sp. SNU WT2	0	0	0	4	0
Gemella haemolysans	0	0	0	4	0
Megasphaera elsdenii	0	0	0	4	0
Neisseria sp. 10022	0	0	0	4	0
Olsenella sp. oral taxon 807	0	0	0	4	0
Streptococcus periodonticum	0	0	0	4	0
Tomato mosaic virus	0	0	0	4	0
Treponema caldarium DSM 7334	0	0	0	4	0
Flaviflexus sp. H23T48	0	0	1	3	14
Sphingomonas hengshuiensis	0	0	0	3	4
Isosphaera pallida ATCC 43644	0	0	2	3	1
Sphingobacterium daejeonense	0	0	0	3	1
Aggregatibacter aphrophilus	0	0	4	3	0
Snodgrassella alvi wkB2	0	0	2	3	0
Aerococcus sanguinicola	0	0	0	3	0
Bacteroides helcogenes P 36-108	0	0	0	3	0
Bacteroides sp. A1C1	0	0	0	3	0
Campylobacter sputorum	0	0	0	3	0
Capnocytophaga sp. oral taxon 864	0	0	0	3	0
Capnocytophaga sp. oral taxon 878	0	0	0	3	0
Clostridiaceae bacterium 14S0207	0	0	0	3	0
Corynebacterium singulare	0	0	0	3	0
Cytobacillus kochii	0	0	0	3	0
Erysipelothrix larvae	0	0	0	3	0
Muribaculum intestinale	0	0	0	3	0
Neisseria canis	0	0	0	3	0
Neisseria polysaccharea	0	0	0	3	0
Planctomycetes bacterium K23_9	0	0	0	3	0
Polaribacter reichenbachii	0	0	0	3	0
Streptomyces aureoverticillatus	0	0	0	3	0
Friedmanniella sagamiharensis	0	0	7	2	3
Egicoccus halophilus	0	0	2	2	3
Corynebacterium stationis	0	0	7	2	2
Kocuria indica	0	0	4	2	2
Thermobifida fusca YX	0	0	1	2	2
Candidatus Nitrosocaldus islandicus	0	0	0	2	2
Lichenihabitans psoromatis	0	0	0	2	2
Ethanoligenens harbinense	0	0	1	2	1
Nonomuraea sp. WYY166	0	0	1	2	1
Phycicoccus dokdonensis	0	0	1	2	1
Flavobacterium crocinum	0	0	0	2	1
Kytococcus sedentarius DSM 20547	0	0	0	2	1
Streptococcus sp. 116-D4	0	0	0	2	1
Streptomyces galilaeus	0	0	0	2	1
Flavisolibacter ginsenosidimutans	0	0	23	2	0
Arsenophonus nasoniae	0	0	6	2	0
Paracoccus kondratievae	0	0	2	2	0
Paraflavitalea soli	0	0	2	2	0
Bacteroides fragilis	0	0	1	2	0
Murine leukemia virus	0	0	1	2	0
Mycobacterium stomatepiae	0	0	1	2	0
Sorangium cellulosum So0157-2	0	0	1	2	0
Acidipropionibacterium virtanenii	0	0	0	2	0
Aquifex aeolicus VF5	0	0	0	2	0
Burkholderia sp. CCGE1003	0	0	0	2	0
Campylobacter concisus 13826	0	0	0	2	0
Clostridiales bacterium CCNA10	0	0	0	2	0
Clostridium sp. SYSU GA15002T	0	0	0	2	0
Ehrlichia ruminantium str. Welgevonden	0	0	0	2	0
Flavobacterium arcticum	0	0	0	2	0
Gemella sanguinis	0	0	0	2	0
Glaesserella parasuis SH0165	0	0	0	2	0
Haemophilus parainfluenzae T3T1	0	0	0	2	0
Leptotrichia wadei	0	0	0	2	0
Mesorhizobium oceanicum	0	0	0	2	0
Neisseria animalis	0	0	0	2	0
Neisseria chenwenguii	0	0	0	2	0
Neisseria weaveri	0	0	0	2	0
Neisseria zoodegmatis	0	0	0	2	0
Ochrobactrum quorumnocens	0	0	0	2	0
Providencia heimbachae	0	0	0	2	0
Salinivirga cyanobacteriivorans	0	0	0	2	0
Sphaerochaeta globosa str. Buddy	0	0	0	2	0
Streptococcus anginosus subsp. whileyi MAS624	0	0	0	2	0
Streptococcus intermedius	0	0	0	2	0
Streptococcus milleri	0	0	0	2	0
Streptomyces lividans TK24	0	0	0	2	0
Treponema succinifaciens DSM 2489	0	0	0	2	0
Baekduia soli	0	0	3	1	46
Sphingomonas ginsengisoli An et al. 2013	0	0	2	1	26
Conexibacter woesei DSM 14684	0	0	0	1	14
Propionimicrobium sp. Marseille-P3275	0	0	2	1	13
Paracoccus sp. Arc7-R13	0	0	1	1	9
Granulibacter bethesdensis	0	0	2	1	7
Simkania negevensis Z	0	0	1	1	3
Methylobacterium sp. WL1	0	0	0	1	3
Georgenia sp. ZLJ0423	0	0	2	1	2
Oscillatoria nigro-viridis PCC 7112	0	0	2	1	2
Stenotrophomonas maltophilia JV3	0	0	2	1	2
Candidatus Paracaedibacter acanthamoebae	0	0	1	1	2
[truncated: 1,013 more rows]
